# Supplementary material
Source: PubMed Central journal article supplement (PMC3457319)
Supplement: JVI.01498-12_zjv999096617so1.pdf [file JVI.01498-12_zjv999096617so1.pdf]

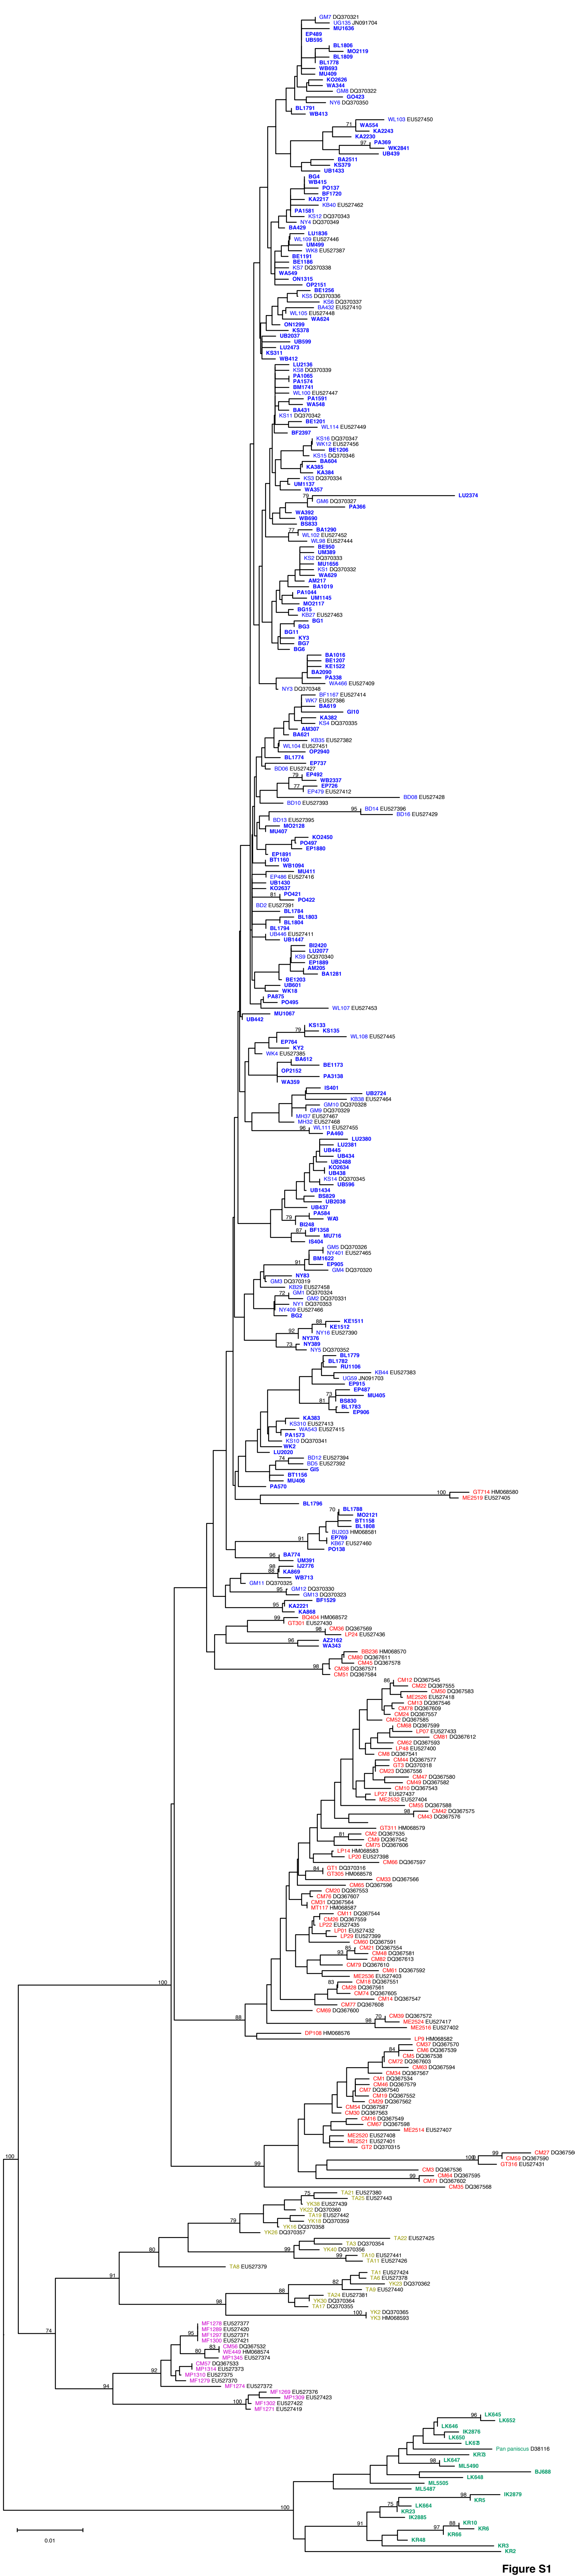

Figure S1

1 **Figure S1. Subspecies origin of chimpanzee fecal samples.** Mitochondrial DNA sequences  
2 (a 479 bp D loop fragment) from 2,070 chimpanzee fecal specimens were grouped into unique  
3 mtDNA haplotypes (Table S2) and then compared to subspecies specific reference sequences  
4 by constructing a neighbor joining tree. Haplotypes from *Pan troglodytes* subspecies are color-  
5 coded (blue: *P. t. schweinfurthii*; red: *P. t. troglodytes*; olive: *P. t. verus*; fucsia: *P. t. ellioti*). *Pan*  
6 *paniscus* sequences are shown in green. Novel haplotypes are indicated in bold font. GenBank  
7 accession numbers for previously published sequences are shown in black. Sites that could not  
8 be unambiguously aligned were omitted from the analysis. Numbers at nodes indicate bootstrap  
9 support  $\geq 70\%$ . The scale bar represents 0.01 substitutions/site.

**Table S1. SIVcpz and pan-SIV specific primer sets**

| Gene             | Round of nested PCR              | Primer                               | Sequence (5' to 3') <sup>2</sup>       | Amplicon size (bp) <sup>1</sup> | Reference  |
|------------------|----------------------------------|--------------------------------------|----------------------------------------|---------------------------------|------------|
| <i>gag</i>       | 1                                | CPZ-gag-F1                           | 5'-AAAATCTCTAGCAGTGGCGCCCGAACA-3'      | 610                             | this study |
|                  |                                  | CPZ-gag-R1a                          | 5'-TCCCAVTCWGCTGCTCNCATTGAT-3'         |                                 | this study |
|                  | or                               |                                      |                                        |                                 |            |
|                  | CPZ-gag-R1b                      | 5'-TGCTCNCATTGATBACTTC-3'            | this study                             |                                 |            |
|                  | 2                                | CPZ-gag-F2                           | 5'-TAGRGGGAAGRDCAAGTCYCTAGG-3'         |                                 | this study |
|                  | CPZ-gag-R2                       | 5'-GCWGARAASATWGGDATBACTTCTGG-3'     | this study                             |                                 |            |
| <i>pol(long)</i> | 1                                | PTS-pol-F1                           | 5'-TGCCAGGYHACHTGGRTACCWGADTGGGA-3'    | 950                             | this study |
|                  |                                  | PTS-pol-R1                           | 5'-ACTGCYCCTTCWCCTTTCCA-3'             |                                 | this study |
|                  | or                               |                                      |                                        |                                 |            |
|                  | CPZ-pol-F1d                      | 5'-TGGTGGHCWGABTAYTGGCA-3'           | this study                             |                                 |            |
|                  | CPZ-pol-R1c                      | 5'-ACTGCHCCYTCWCCTTTCCACA-3'         | this study                             |                                 |            |
|                  | 2                                | PTS-pol-F2                           | 5'-TWYTATGTDGATGGRGCAGC-3'             |                                 | this study |
|                  | PTS-pol-R2                       | 5'-CCCCAATCCCCCTTTTCTYTTAAAATTGTG-3' | this study                             |                                 |            |
|                  | or                               |                                      |                                        |                                 |            |
|                  | CPZ-pol-F2c                      | 5'-GAAACHTWTTATGTWGATGGRGCAGC-3'     | this study                             |                                 |            |
|                  | CPZ-pol-R2                       | 5'-CCAATYCCYCCYTTYKYTTAAAATT-3'      | (78)                                   |                                 |            |
| <i>pol(mini)</i> | 1                                | PTS-pol-F3                           | 5'-GCAGTAAARGCRGCMGTGGTG-3'            | 280                             | this study |
|                  |                                  | PTS-pol-R1                           | 5'-ACTGCYCCTTCWCCTTTCCA-3'             |                                 | this study |
|                  | or                               |                                      |                                        |                                 |            |
|                  | CPZ-pol-R1c                      | 5'-ACTGCHCCYTCWCCTTTCCACA-3'         | this study                             |                                 |            |
|                  | 2                                | CPZ-pol-F4                           | 5'-AYAAYCCHCAAAGTCAAGGAGTRGT-3'        |                                 | this study |
|                  | CPZ-pol-R4                       | 5'-TCCTTTCCAAATDGGRTCTCTGCTGTC-3'    | this study                             |                                 |            |
| <i>vpu</i>       | 1                                | PTS-rev-5F1                          | 5'-GGRATYTCCTATGGCAGGAAGA-3'           | 330 or 550                      | this study |
|                  |                                  | PTS-vpu-R                            | 5'-GCAWANCCCTGSTGGAGCACA-3'            |                                 | this study |
|                  | or                               |                                      |                                        |                                 |            |
|                  | PTS-rev-5F1a                     | 5'-TCMTATGGCAGGAAGAGAAGAG -3'        | this study                             |                                 |            |
|                  | 2                                | PTS-rev-5F2                          | 5'-TCCTGTAYSAMAGYAGTAAGTA-3'           |                                 |            |
|                  | PTS-vpu-R1                       | 5'-GGTGTYARYTTWACACA-3'              |                                        |                                 |            |
| or               |                                  |                                      |                                        |                                 |            |
| PTS-vpu-R2       | 5'-GCMTYTYTCCADAYDGGBACHCCATA-3' | this study                           |                                        |                                 |            |
| <i>gp41(env)</i> | 1                                | PTS-gp41-F1                          | 5'-TTCTYAGYGCAGCWGGMAGTAC-3'           | 490                             | this study |
|                  |                                  | PTS-gp41-R1                          | 5'-ARRRGHDDATADCCCTGCCTAA-3'           |                                 | this study |
|                  | 2                                | PTS-gp41-F2                          | 5'-TACWATGGGCGCAGCGTCAMTAGCGCTG-3'     |                                 | this study |
|                  | PTS-gp41-R2                      | 5'-CCAYAGCCAWTKWGTDATRTCAAACCA-3'    | this study                             |                                 |            |
| <i>gp41/nef</i>  | 1                                | PTS-gp41/nef-F1                      | 5'-AAATGGAGCWSWYHTGGRAYTGGTTTGA-3'     | 880                             | this study |
|                  |                                  | PTS-gp41/nef-R                       | 5'-ACATCCASRTRTCYAGKATDGGCTGCTCT-3'    |                                 | this study |
|                  | 2                                | PTS-gp41/nef-F2                      | 5'-TGTTTTGAYATMACWMAWTGGCTRTGGTATAT-3' |                                 | this study |
|                  | CPZ-gp41/nef-R1                  | 5'-CCCHTCCAGTCCYCCCTTTTC-3'          | this study                             |                                 |            |
|                  | or                               |                                      |                                        |                                 |            |
| CPZ-gp41/nef-R2  | 5'-CAGTCCYCCCTTTTCTTTTAAAAA-3'   | this study                           |                                        |                                 |            |
| pan-SIV-IN       | 1                                | polis4                               | 5'-CCAGCNCACAAAGGNATAGGAGG-3'          | 400                             | (44)       |
|                  |                                  | polOR                                | 5'-ACBACYGCNCCTTCHCCTTTTC-3'           |                                 |            |
|                  | 2                                | polis2                               | 5'-TGGCARATRGAYTGYACNCAYNTRGAA-3'      |                                 |            |
|                  | uni2                             | 5'-CCCCTATTCTCCCTTCTTTTAAAAA-3'      |                                        |                                 |            |

<sup>1</sup>Amplicon size includes primer sequences.<sup>2</sup>Y=C/T, W=A/T, R=A/G, H=A/C/T, B=C/G/T, S=G/C, K=G/T, M=A/C, D=A/G/T, V=A/C/G, N=A/C/T/G.

Table S2. Mitochondrial DNA analysis of ape fecal samples

| Haplotype <sup>1</sup> | Fecal samples with identical mtDNA haplotype <sup>2</sup>                                                                                                                                                                                                                                                                                                                                                                                                                                                                                                              | GenBank accession number |
|------------------------|------------------------------------------------------------------------------------------------------------------------------------------------------------------------------------------------------------------------------------------------------------------------------------------------------------------------------------------------------------------------------------------------------------------------------------------------------------------------------------------------------------------------------------------------------------------------|--------------------------|
| AM205                  | AM205, AM208, AM209, AM210, AM211, AM213, AM214, BA1279, BA1280, BA1282, BA1283, BA1284, BA1285, BA1286, BA1287, BA1734, BA1736, BA1737, BA1738, BA1739, BA1740                                                                                                                                                                                                                                                                                                                                                                                                        | JQ866072                 |
| AM217                  | AM217, AM219, AM221, AM222, AM223, AM224, AM225, AM226, AM289, AM290, AM291, AM294, AM301, AM303, AM306, AM309                                                                                                                                                                                                                                                                                                                                                                                                                                                         | JQ866073                 |
| AM307                  | AM307                                                                                                                                                                                                                                                                                                                                                                                                                                                                                                                                                                  | JQ866074                 |
| AZ2162                 | AZ2162, AZ2163, AZ2164, AZ2169, KA2172, KA2192, KA2218, KA2248                                                                                                                                                                                                                                                                                                                                                                                                                                                                                                         | JQ866075                 |
| BA429                  | BA429                                                                                                                                                                                                                                                                                                                                                                                                                                                                                                                                                                  | JQ866082                 |
| BA431                  | BA431                                                                                                                                                                                                                                                                                                                                                                                                                                                                                                                                                                  | JQ866083                 |
| BA432                  | BA432, BA433                                                                                                                                                                                                                                                                                                                                                                                                                                                                                                                                                           | EU527410                 |
| BA604                  | BA604, BA606, BA607, BA608, BA610, BA611                                                                                                                                                                                                                                                                                                                                                                                                                                                                                                                               | JQ866084                 |
| BA612                  | BA612                                                                                                                                                                                                                                                                                                                                                                                                                                                                                                                                                                  | JQ866085                 |
| BA619                  | BA619, BA620                                                                                                                                                                                                                                                                                                                                                                                                                                                                                                                                                           | JQ866086                 |
| BA621                  | BA621, BA622, BA623                                                                                                                                                                                                                                                                                                                                                                                                                                                                                                                                                    | JQ866087                 |
| BA774                  | BA774, BE1205, KA2260, KA2261                                                                                                                                                                                                                                                                                                                                                                                                                                                                                                                                          | JQ866088                 |
| BA1016                 | BA1016, BA1017, BA1018, BA1032, BA1033, BA1036                                                                                                                                                                                                                                                                                                                                                                                                                                                                                                                         | JQ866076                 |
| BA1019                 | BA1019, BA1020, BA1021, BA1022, BA1023, BA1024, BA1025, BA1026, BA1027, BA1028, BA1029, BA1030, BA1031, BA1034, BA1035                                                                                                                                                                                                                                                                                                                                                                                                                                                 | JQ866077                 |
| BA1281                 | BA1281                                                                                                                                                                                                                                                                                                                                                                                                                                                                                                                                                                 | JQ866078                 |
| BA1290                 | BA1290                                                                                                                                                                                                                                                                                                                                                                                                                                                                                                                                                                 | JQ866079                 |
| BA2090                 | BA2090, BA2091, BA2092, BA2093, BA2094, BA2095, BA2096, BA2097, BA2098, BA2099, BA2100, BA2101, BA2102, BA2103, BA2104, BA2105, BA2106, BA2107, BA2108, BA2109, BA2110, BA2111, BA2112, BA2113, OP2929, OP2941, OP2942, OP2943                                                                                                                                                                                                                                                                                                                                         | JQ866080                 |
| BA2511                 | BA2511, BA2512, BA2513, BA2514, BA2515, BA2516, BA2517, BA2518, BA2519, BA2520                                                                                                                                                                                                                                                                                                                                                                                                                                                                                         | JQ866081                 |
| BD2                    | AN1557, AN1559, AN1560, AN1561, AN1562, AN1563, AN1564, AN1565, AN1566, AN1567, AN1568, AN1569, AN1570, AN1571, AN1572, BL1775, BD1, BD2, BD3, BD4, BS837, BT1157, DL1616, DL1617, DL1618, DL1619, DL1620, EP741, EP744, EP745, EP746, EP752, EP755, IS0400, IS0403, KA2207, KA2208, MN2695, MA2403, MA2405, MA2406, MA2407, MA2409, MA2410, MA2411, MO2125, NI804, NI805, NI806, RU1089, RU1107, RU1110, RU1123, RU1125, WB696, WB698, WB699, WB700, WB701, WB709, WB710, WB711, WB712, WB714, WB1093, WB1113, WB1114, WB1116, WB1119, WB1129, WB1134, WB1135, WB2320 | EU527391                 |
| BD5                    | BD5                                                                                                                                                                                                                                                                                                                                                                                                                                                                                                                                                                    | EU527392                 |
| BD6                    | BD6                                                                                                                                                                                                                                                                                                                                                                                                                                                                                                                                                                    | EU527427                 |
| BD8                    | BD8                                                                                                                                                                                                                                                                                                                                                                                                                                                                                                                                                                    | EU527428                 |
| BD10                   | BD10                                                                                                                                                                                                                                                                                                                                                                                                                                                                                                                                                                   | EU527393                 |
| BD12                   | BD12                                                                                                                                                                                                                                                                                                                                                                                                                                                                                                                                                                   | EU527394                 |
| BD13                   | BD11, BD13, BD15, BD17                                                                                                                                                                                                                                                                                                                                                                                                                                                                                                                                                 | EU527395                 |
| BD14                   | BD14                                                                                                                                                                                                                                                                                                                                                                                                                                                                                                                                                                   | EU527396                 |
| BD16                   | BD16                                                                                                                                                                                                                                                                                                                                                                                                                                                                                                                                                                   | EU527429                 |
| BE950                  | BE950, BE953, BE954, BE955, BE956, BE959, BE961, BE963, BE964, BE966, BE967, BE970, BE971, BE972, BE973, BE974, BE976, BE977, BE978, BE983, BE984, UM987, UM993, UM995, UM997, UM998, UM1001, UM1005, UM1006, UM1007, UM1014                                                                                                                                                                                                                                                                                                                                           | JQ866097                 |
| BE1173                 | BE1173, BE1174, BE1175                                                                                                                                                                                                                                                                                                                                                                                                                                                                                                                                                 | JQ866089                 |
| BE1186                 | BE1186                                                                                                                                                                                                                                                                                                                                                                                                                                                                                                                                                                 | JQ866090                 |
| BE1191                 | BE1191, BE1192, BE1193, BE1261, BE1262, BE1263                                                                                                                                                                                                                                                                                                                                                                                                                                                                                                                         | JQ866091                 |
| BE1201                 | BE1201, BE1204                                                                                                                                                                                                                                                                                                                                                                                                                                                                                                                                                         | JQ866092                 |
| BE1203                 | BE1203, BI2413, BI2414, BI2425                                                                                                                                                                                                                                                                                                                                                                                                                                                                                                                                         | JQ866093                 |
| BE1206                 | BE1206, BE1214                                                                                                                                                                                                                                                                                                                                                                                                                                                                                                                                                         | JQ866094                 |
| BE1207                 | BE1207                                                                                                                                                                                                                                                                                                                                                                                                                                                                                                                                                                 | JQ866095                 |
| BE1256                 | BE1256, LU2067, LU2073, LU2074, LU2079                                                                                                                                                                                                                                                                                                                                                                                                                                                                                                                                 | JQ866096                 |
| BF1167                 | BF1161, BF1162, BF1163, BF1164, BF1165, BF1166, BF1167, BF1168, BF1169, BF1170, BF1171, BF1172                                                                                                                                                                                                                                                                                                                                                                                                                                                                         | EU527414                 |
| BF1358                 | BF1358, BF1359                                                                                                                                                                                                                                                                                                                                                                                                                                                                                                                                                         | JQ866098                 |
| BF1529                 | BF1529, BF1530, BF1531, BF1532, BF1533, BF1534, BF1535, BF1536, BF1537, BF1538, BF1539, BF1540, BF1541                                                                                                                                                                                                                                                                                                                                                                                                                                                                 | JQ866099                 |
| BF1720                 | BF1720, BF1723                                                                                                                                                                                                                                                                                                                                                                                                                                                                                                                                                         | JQ866100                 |
| BF2397                 | BF2397, BF2398, BF2400, BF2401                                                                                                                                                                                                                                                                                                                                                                                                                                                                                                                                         | JQ866101                 |
| BG1                    | BG1                                                                                                                                                                                                                                                                                                                                                                                                                                                                                                                                                                    | JQ866102                 |
| BG2                    | BG2, BG20                                                                                                                                                                                                                                                                                                                                                                                                                                                                                                                                                              | JQ866105                 |
| BG3                    | BG3, BG13, BG16, BG18                                                                                                                                                                                                                                                                                                                                                                                                                                                                                                                                                  | JQ866106                 |
| BG4                    | BG4, BG14                                                                                                                                                                                                                                                                                                                                                                                                                                                                                                                                                              | JQ866107                 |
| BG6                    | BG6, BG12                                                                                                                                                                                                                                                                                                                                                                                                                                                                                                                                                              | JQ866108                 |
| BG7                    | BG7, BG9, BG10                                                                                                                                                                                                                                                                                                                                                                                                                                                                                                                                                         | JQ866109                 |
| BG11                   | BG11                                                                                                                                                                                                                                                                                                                                                                                                                                                                                                                                                                   | JQ866103                 |
| BG15                   | BG15                                                                                                                                                                                                                                                                                                                                                                                                                                                                                                                                                                   | JQ866104                 |
| BI248                  | BI248, BI249, BI252, BI253, BI259, BI260, BI262, BI265, BI266, BI267, BI268, BI274, BI278, BI283, BI284, GO427                                                                                                                                                                                                                                                                                                                                                                                                                                                         | JQ866111                 |
| BI2420                 | BI2420                                                                                                                                                                                                                                                                                                                                                                                                                                                                                                                                                                 | JQ866110                 |
| BL1774                 | BL1774, BL1776, BL1781                                                                                                                                                                                                                                                                                                                                                                                                                                                                                                                                                 | JQ866112                 |
| BL1778                 | BL1778, BL1793, BL1798, BL1822                                                                                                                                                                                                                                                                                                                                                                                                                                                                                                                                         | JQ866113                 |
| BL1779                 | BL1779, BL1780                                                                                                                                                                                                                                                                                                                                                                                                                                                                                                                                                         | JQ866114                 |

|        |                                                                                                                                                                                                                                                        |          |
|--------|--------------------------------------------------------------------------------------------------------------------------------------------------------------------------------------------------------------------------------------------------------|----------|
| BL1782 | BL1782, BL1811                                                                                                                                                                                                                                         | JQ866115 |
| BL1783 | BL1783, BL1785                                                                                                                                                                                                                                         | JQ866116 |
| BL1784 | BL1784, BL1786, BL1787                                                                                                                                                                                                                                 | JQ866117 |
| BL1788 | BL1788, BL1789, BL1790, BL1816, BL1818, BL1821                                                                                                                                                                                                         | JQ866118 |
| BL1791 | BL1791, BL1792                                                                                                                                                                                                                                         | JQ866119 |
| BL1794 | BL1794, KO2711, KO2712, KO2713, KO2714, KO2715                                                                                                                                                                                                         | JQ866120 |
| BL1796 | BL1796, BL1797, BL1799, BL1800, BL1802                                                                                                                                                                                                                 | JQ866121 |
| BL1803 | BL1803, BL1813, BL1814, BL1817, BL1820, MO2115                                                                                                                                                                                                         | JQ866122 |
| BL1804 | BL1804, BL1819, BS831, BS1614                                                                                                                                                                                                                          | JQ866123 |
| BL1806 | BL1806, BL1807                                                                                                                                                                                                                                         | JQ866124 |
| BL1808 | BL1808                                                                                                                                                                                                                                                 | JQ866125 |
| BL1809 | BL1809, MO2129, MO2130, MO2131                                                                                                                                                                                                                         | JQ866126 |
| BM1622 | BM1622, BM1625, BM1626, BM1627, BM1628, BM1629, BM1630, BM1631, BM1632, BM1633, BM1634, BM1635, GI1, GI9, GI11, GI12, GI16, GI20, GI21, GI27, GI29, GI37, GI38, GI41, GI43, GI44, GI49                                                                 | JQ866127 |
| BM1741 | BM1741, BM1742, BM1743, BM1744, BM1745, BM1746, BM1747, BM1749, BM1750, BM1751, BM1752, BM1753, BM1754, BM1755, BM1756, BM1757, BM1758, BM1759, BM1760, BM1761, BM1762, BM1763, BM1764, BM1765, BM1766, BM1767, BM1768, BM1769, BM1770, BM1771, BM1772 | JQ866128 |
| BS829  | BS829                                                                                                                                                                                                                                                  | JQ866129 |
| BS830  | BS830, BS1611                                                                                                                                                                                                                                          | JQ866130 |
| BS833  | BS833                                                                                                                                                                                                                                                  | JQ866131 |
| BT1156 | BT1156                                                                                                                                                                                                                                                 | JQ866132 |
| BT1158 | BT1158                                                                                                                                                                                                                                                 | JQ866133 |
| BT1160 | BT1160                                                                                                                                                                                                                                                 | JQ866134 |
| BU203  | BU203                                                                                                                                                                                                                                                  | HM068581 |
| BW8    | KY7, KY9, KY10                                                                                                                                                                                                                                         | JQ812126 |
| BW23   | GI2, GI4, GI14, GI31, GI33, GI45, GI46, GI47                                                                                                                                                                                                           | JQ812122 |
| EP479  | EP479, EP480, EP481, EP494, EP884, EP886, EP888, EP889                                                                                                                                                                                                 | EU527412 |
| EP486  | BL1773, BS836, EP482, EP483, EP484, EP485, EP486, KS202, MO2118, MO2120                                                                                                                                                                                | EU527416 |
| EP487  | EP487, EP488, EP727, EP763, EP772                                                                                                                                                                                                                      | JQ866138 |
| EP489  | EP489, EP490, MO2116, MO2124, NI802                                                                                                                                                                                                                    | JQ866139 |
| EP492  | EP492, EP750, EP762, EP885, EP890, EP920, WB2336, WB2340                                                                                                                                                                                               | JQ866140 |
| EP726  | EP726, EP732, EP733, EP756, EP757, EP758, EP771                                                                                                                                                                                                        | JQ866141 |
| EP737  | EP737, EP742, EP759, EP760, EP761, EP893, EP894, EP895, EP896, EP897, EP899, EP900, EP902, EP903, EP1904, EP1905, EP1906, EP1907, EP1908                                                                                                               | JQ866142 |
| EP764  | EP764                                                                                                                                                                                                                                                  | JQ866143 |
| EP769  | BS832, EP769, EP773                                                                                                                                                                                                                                    | JQ866144 |
| EP905  | EP905                                                                                                                                                                                                                                                  | JQ866145 |
| EP906  | BL1812, EP906, EP907, EP908, EP909, EP910, EP911, EP912, EP913                                                                                                                                                                                         | JQ866146 |
| EP915  | EP915, EP917, EP918, EP919, EP922, EP923, EP925, EP926, EP927                                                                                                                                                                                          | JQ866147 |
| EP1880 | EP1880, EP1881, EP1882, EP1883, EP1884, EP1885, EP1887, EP1888                                                                                                                                                                                         | JQ866135 |
| EP1889 | EP1889, EP1895, EP1897, EP1899, EP1901, EP1903                                                                                                                                                                                                         | JQ866136 |
| EP1891 | EP1891, EP1892, EP1893, EP1894, EP1898, EP1902                                                                                                                                                                                                         | JQ866137 |
| GI5    | GI5, GI18, GI19, GI24, GI48                                                                                                                                                                                                                            | JQ866149 |
| GI10   | GI10, GI13, GI17, GI23, GI25                                                                                                                                                                                                                           | JQ866148 |
| GM9    | GI3, GI6, GI7, GI26                                                                                                                                                                                                                                    | DQ370329 |
| GO423  | GO423                                                                                                                                                                                                                                                  | JQ866150 |
| IJ2776 | IJ2776                                                                                                                                                                                                                                                 | JQ866151 |
| IS401  | IS0401                                                                                                                                                                                                                                                 | JQ866152 |
| IS404  | IS0404                                                                                                                                                                                                                                                 | JQ866153 |
| KA382  | KA382                                                                                                                                                                                                                                                  | JQ866159 |
| KA383  | KA383                                                                                                                                                                                                                                                  | JQ866160 |
| KA384  | KA384                                                                                                                                                                                                                                                  | JQ866161 |
| KA385  | KA385, KA386                                                                                                                                                                                                                                           | JQ866162 |
| KA868  | KA868, KA870, KA872                                                                                                                                                                                                                                    | JQ866163 |
| KA869  | BE1202, KA869, KA873, LU1858, ON1302, ON1303, ON1318, ON1320, ON1321, ON1329, ON1332, ON1334, ON1335, ON1336, ON1337, ON1338, ON1340, ON1341, ON1344, ON1346, ON1347, ON1348, ON1355                                                                   | JQ866164 |
| KA2217 | KA2217, KA2240                                                                                                                                                                                                                                         | JQ866155 |
| KA2221 | BE1208, KA2166, KA2176, KA2178, KA2182, KA2183, KA2187, KA2197, KA2199, KA2200, KA2205, KA2211, KA2212, KA2213, KA2214, KA2215, KA2221, KA2224, KA2226, KA2242, KA2245, KA2250, KA2256, KA2257, KA2258, KA2259, KS201                                  | JQ866156 |
| KA2230 | KA2230                                                                                                                                                                                                                                                 | JQ866157 |
| KA2243 | KA2203, KA2204, KA2227, KA2243, KA2244, KA2255                                                                                                                                                                                                         | JQ866154 |
| KB40   | BG5, BG17, BG19                                                                                                                                                                                                                                        | EU527462 |
| KB73   | KY1, KY4, KY5, KY8, KY11, KY12, KY13, KY15                                                                                                                                                                                                             | EU527461 |
| KE1511 | KE1511                                                                                                                                                                                                                                                 | JQ866165 |
| KE1512 | KE1512, KE1513, KE1516, KE1519                                                                                                                                                                                                                         | JQ866166 |
| KE1522 | KE1522, KE1523                                                                                                                                                                                                                                         | JQ866167 |
| KO2450 | KO2450, KO2451                                                                                                                                                                                                                                         | JQ866168 |
| KO2626 | KO2626, KO2627, KO2628, KO2629, KO2630, KO2631, KO2632, KO2633, KO2657                                                                                                                                                                                 | JQ866169 |

|        |                                                                                                                                                                                                                                                                                                                                                                                                                                                                                                                                                                   |          |
|--------|-------------------------------------------------------------------------------------------------------------------------------------------------------------------------------------------------------------------------------------------------------------------------------------------------------------------------------------------------------------------------------------------------------------------------------------------------------------------------------------------------------------------------------------------------------------------|----------|
| KO2634 | KO2634, KO2639                                                                                                                                                                                                                                                                                                                                                                                                                                                                                                                                                    | JQ866170 |
| KO2637 | KO2637, KO2640, KO2652, KO2658                                                                                                                                                                                                                                                                                                                                                                                                                                                                                                                                    | JQ866171 |
| KS1    | BA1369, BA1370, BA1372, BA1373, BA1374, BA1375, BA1376, BA1377, BA1378, BA1379, BA1381, BA1384, BA1389, BA1391, BA1392, BA1393, BA1396, BA1398, BA1399, BA1400, BA1401, BA1402, BA1403, BA1404, BA1405, BA1406, BA1409, BA1411, BA1412, BA1413, BA1414, BA1415, BA1416, LU2083, LU2084, LU2085, LU2086, LU2087, LU2088, LU2089, WA1, WA2                                                                                                                                                                                                                          | DQ370332 |
| KS2    | BA807, BA808, BA809, BA810, BA811, BA812, BA813, BA814, BA815, BA816, BA817, BA818, BA819, BA820, BA821, BA822, BA823, BA824, BA825, BA826, BA827, BA2856, BA2857, BA2858, BA2859, BA2860, BA2861, BA2862, BA2863, BA2864, BA2865, BA2866, BA2867, BA2868, BA2869, BA2870, BA2871, BA2872, BI242, BI243, BI244, BI245, BI246, BI247, MU410, UM388, WA10, WA12, WA15, WA25, WA26, WA28, WA30, WA31, WA32, WA630, WA640                                                                                                                                             | DQ370333 |
| KS3    | KA2216, WA7, WA8, WA9, WA11, WA13, WA14, WA16                                                                                                                                                                                                                                                                                                                                                                                                                                                                                                                     | DQ370334 |
| KS4    | WA17                                                                                                                                                                                                                                                                                                                                                                                                                                                                                                                                                              | DQ370335 |
| KS5    | BE928, BE929, BE930, BE931, BE932, BE933, BE934, BE935, BE936, BE937, BE938, BE940, BE941, BE942, BE943, BE946, BE1185, BE1211, BE1257, BE1258, BE1259, IJ2774, IJ2777, IJ2786, IJ2810, IJ2811, IJ2827, ON1326, UM988, UM989, UM990, UM991, UM992, UM994, UM999, UM1000, UM1002, UM1003, UM1004, UM1008, UM1010, UM1011, UM1012, UM1013, UM1015, WA5, WA6, WA18, WA19, WA20, WA23, WA511, WA512, WA513, WA514, WA515, WA516, WA517, WA518, WL117                                                                                                                  | DQ370336 |
| KS6    | WA24                                                                                                                                                                                                                                                                                                                                                                                                                                                                                                                                                              | DQ370337 |
| KS7    | WA34, WA36, WA37                                                                                                                                                                                                                                                                                                                                                                                                                                                                                                                                                  | DQ370338 |
| KS8    | BA1293, BA1294, BA1295, BA1298, BE838, BE842, BE858, WA33, WA38, WA40, WA42                                                                                                                                                                                                                                                                                                                                                                                                                                                                                       | DQ370339 |
| KS9    | BA613, BA614, BA615, BA616, BA617, BA618, BA1467, BI2417, BI2422, BI2423, BI2424, BI2426, BI2427, BI2429, BI2431, BI2433, BI2435, BI2437, BI2438, BI2440, KA1683, KA1684, KA2198, KA2201, KA2206, KA2210, KA2222, KA2235, LU2066, LU2068, LU2069, LU2075, LU2076, LU2080, LU2081, LU2082, OP2158, PA75                                                                                                                                                                                                                                                            | DQ370340 |
| KS10   | KA2202, KA2223, OP2930, OP2931, OP2932, OP2933, OP2934, OP2935, OP2936, OP2937, OP2938, OP2939, OP2944, OP2945, OP2946, OP2947, OP2948, OP2949, OP2950, OP2951, OP2952, OP2953, PA76                                                                                                                                                                                                                                                                                                                                                                              | DQ370341 |
| KS11   | AM215, AM216, AM218, AM220, AM285, BE850, BE944, BE1183, BE1184, BE1189, BE1194, BE1195, BE1196, BE1197, BE1198, BE1199, BI54, BI58, BI62, BI78, BI323, BI324, BI326, BI327, BI328, BI329, KA797, KA798, KA799, KA800, KA801, LU2064, LU2065, LU2070, LU2071, LU2072, LU2078, OP2153, OP2154, OP2155, OP2156, OP2157, UD319, UD320, UD321, UM1138, UM1139, UM1140, UM1141, UM1142, UM1144, UM1148, UM1153, UM1154, UM1155, WA21, WA22, WA27, WA29, WA519, WA520, WA522, WA523, WA524, WA525, WA526, WA527, WA529, WA530, WA531, WA532, WA547, WA551, WA552, WA553 | DQ370342 |
| KS12   | BI68, BI71, BI85                                                                                                                                                                                                                                                                                                                                                                                                                                                                                                                                                  | DQ370343 |
| KS14   | BI64, BI67, BI70, BI72, BI73, BI74, BI79, BI82, BI83, BI89, BI94, BI95                                                                                                                                                                                                                                                                                                                                                                                                                                                                                            | DQ370345 |
| KS15   | BI55, BI59, BI61, BI65, BI69, BI77, BI86, BI90, BI93, BI96                                                                                                                                                                                                                                                                                                                                                                                                                                                                                                        | DQ370346 |
| KS16   | BI84, BI87, BI88, BI92, BI97                                                                                                                                                                                                                                                                                                                                                                                                                                                                                                                                      | DQ370347 |
| KS133  | BL1795, KS133, KS134                                                                                                                                                                                                                                                                                                                                                                                                                                                                                                                                              | JQ866172 |
| KS135  | KS135                                                                                                                                                                                                                                                                                                                                                                                                                                                                                                                                                             | JQ866173 |
| KS310  | KS310                                                                                                                                                                                                                                                                                                                                                                                                                                                                                                                                                             | EU527413 |
| KS311  | BL1801, EP724, EP728, EP729, EP730, EP731, EP734, EP735, EP743, EP765, EP766, EP767, EP768, EP770, EP878, EP879, EP880, EP881, EP882, EP883, KS204, KS311, KS313, UB1442                                                                                                                                                                                                                                                                                                                                                                                          | JQ866174 |
| KS378  | KS378                                                                                                                                                                                                                                                                                                                                                                                                                                                                                                                                                             | JQ866175 |
| KS379  | KS379                                                                                                                                                                                                                                                                                                                                                                                                                                                                                                                                                             | JQ866176 |
| KY2    | KY2, KY6, KY16                                                                                                                                                                                                                                                                                                                                                                                                                                                                                                                                                    | JQ866177 |
| KY3    | KY3, KY14                                                                                                                                                                                                                                                                                                                                                                                                                                                                                                                                                         | JQ866178 |
| LU1836 | LU1836                                                                                                                                                                                                                                                                                                                                                                                                                                                                                                                                                            | JQ866179 |
| LU2020 | LU2020, LU2021, LU2022, LU2023, LU2024, LU2025, LU2026, LU2027, LU2028, LU2029, LU2030, LU2031, LU2032, LU2033, LU2034, LU2035, LU2036                                                                                                                                                                                                                                                                                                                                                                                                                            | JQ866180 |
| LU2077 | LU2077                                                                                                                                                                                                                                                                                                                                                                                                                                                                                                                                                            | JQ866181 |
| LU2136 | LU2136, LU2137, LU2139, LU2384, LU2396                                                                                                                                                                                                                                                                                                                                                                                                                                                                                                                            | JQ866182 |
| LU2374 | LU2374                                                                                                                                                                                                                                                                                                                                                                                                                                                                                                                                                            | JQ866183 |
| LU2380 | LU2380                                                                                                                                                                                                                                                                                                                                                                                                                                                                                                                                                            | JQ866184 |
| LU2381 | LU2381                                                                                                                                                                                                                                                                                                                                                                                                                                                                                                                                                            | JQ866185 |
| LU2473 | LU2473, LU2482, UB2055, UB2056, UB2057, UB2058, UB2059                                                                                                                                                                                                                                                                                                                                                                                                                                                                                                            | JQ866186 |
| MO2117 | MO2117                                                                                                                                                                                                                                                                                                                                                                                                                                                                                                                                                            | JQ866187 |
| MO2119 | MO2119                                                                                                                                                                                                                                                                                                                                                                                                                                                                                                                                                            | JQ866188 |
| MO2121 | MO2121                                                                                                                                                                                                                                                                                                                                                                                                                                                                                                                                                            | JQ866189 |
| MO2128 | MO2128                                                                                                                                                                                                                                                                                                                                                                                                                                                                                                                                                            | JQ866190 |
| MU405  | EP725, EP738, EP739, EP740, EP754, MU405, MU408                                                                                                                                                                                                                                                                                                                                                                                                                                                                                                                   | JQ866194 |
| MU406  | MU406                                                                                                                                                                                                                                                                                                                                                                                                                                                                                                                                                             | JQ866195 |
| MU407  | MU407                                                                                                                                                                                                                                                                                                                                                                                                                                                                                                                                                             | JQ866196 |
| MU409  | MU409                                                                                                                                                                                                                                                                                                                                                                                                                                                                                                                                                             | JQ866197 |
| MU411  | MU411, MU715, MU719, MU720                                                                                                                                                                                                                                                                                                                                                                                                                                                                                                                                        | JQ866198 |
| MU716  | MU716, MU717, MU718                                                                                                                                                                                                                                                                                                                                                                                                                                                                                                                                               | JQ866199 |
| MU1067 | EP904, EP914, EP916, MU1067, MU1068, MU1069, MU1070, MU1071, MU1072, MU1073, MU1074, MU1075, MU1076, MU1077, MU1078, MU1079, MU1080, MU1081, MU1082, MU1083, MU1084, MU1085, MU1086                                                                                                                                                                                                                                                                                                                                                                               | JQ866191 |
| MU1636 | MU1636, MU1637, MU1638, MU1640, MU1641, MU1642, MU1643, MU1644, MU1645, MU1646, MU1648, MU1650, MU1651, MU1653, MU1658                                                                                                                                                                                                                                                                                                                                                                                                                                            | JQ866192 |
| MU1656 | MU1656                                                                                                                                                                                                                                                                                                                                                                                                                                                                                                                                                            | JQ866193 |
| NY5    | GI32, GI34, GI39, GI40, GI42                                                                                                                                                                                                                                                                                                                                                                                                                                                                                                                                      | DQ370352 |
| ON1299 | BF1365, ON1299, ON1300, ON1301, ON1306, ON1307, ON1310, ON1311, ON1316, ON1317, ON1325, ON1328, ON1330, ON1339, ON1343, ON1345, ON1351, ON1353, ON1354, ON1356                                                                                                                                                                                                                                                                                                                                                                                                    | JQ866200 |

|        |                                                                                                                                                                                                                                                                                                                                                                                                                                                                                                                    |          |
|--------|--------------------------------------------------------------------------------------------------------------------------------------------------------------------------------------------------------------------------------------------------------------------------------------------------------------------------------------------------------------------------------------------------------------------------------------------------------------------------------------------------------------------|----------|
| ON1315 | ON1315                                                                                                                                                                                                                                                                                                                                                                                                                                                                                                             | JQ866201 |
| OP2151 | OP2151                                                                                                                                                                                                                                                                                                                                                                                                                                                                                                             | JQ866202 |
| OP2152 | OP2152, WK2832, WK2833, WK2835, WK2836, WK2837, WK2838, WK2840, WL99, WL129, WL241                                                                                                                                                                                                                                                                                                                                                                                                                                 | JQ866203 |
| OP2940 | OP2940, OP2954                                                                                                                                                                                                                                                                                                                                                                                                                                                                                                     | JQ866204 |
| PA338  | BR2955, BR2956, BR2957, BR2958, BR2959, BR2960, BR2961, BR2962, BR2963, BR2964, BR2965, BR2966, BR2967, BR2968, BR2969, BR2970, BR2971, BR2972, BR2973, BR2974, BR2975, BR2976, BR2977, BR2978, BR2979, BR2980, BR2981, BR2982, BR2983, BR2984, BR2985, BR2986, BR2987, BR2988, BR2989, BR2990, BR2991, BR2992, BR2993, BR2994, BR2995, BR2996, BR2997, BR2998, BR2999, BR3000, BR3001, BR3002, BR3003, BR3004, BR3005, BR3006, BR3007, BR3008, BR3009, BR3010, BR3011, BR3012, BR3013, PA338, PA339, PA340, PA341 | JQ866212 |
| PA366  | PA366, PA367, PA368                                                                                                                                                                                                                                                                                                                                                                                                                                                                                                | JQ866213 |
| PA369  | LU2665, LU2666, LU2667, LU2668, LU2669, LU2670, LU2671, LU2672, LU2673, PA369, PA370, WK2839                                                                                                                                                                                                                                                                                                                                                                                                                       | JQ866214 |
| PA460  | BI448, BI449, BI450, BI451, BS778, PA452, PA453, PA454, PA455, PA456, PA457, PA459, PA460, PA461, PA462, PA463, PA464, PA465                                                                                                                                                                                                                                                                                                                                                                                       | JQ866215 |
| PA570  | PA570                                                                                                                                                                                                                                                                                                                                                                                                                                                                                                              | JQ866216 |
| PA584  | KA1661, KA1663, KA1664, KA1672, KA1674, KA1675, KA1677, KA1679, KA1680, KA1681, KA1682, KA1686, KA1688, KA1689, KA1690, KA1691, KA1692, KA1693, KA1694, KA1695, KA1696, KA1697, KA1698, KA1699, KA1700, KA1701, KA1702, KA1703, PA567, PA569, PA573, PA574, PA575, PA576, PA579, PA580, PA582, PA583, PA584, PA585, PA586, PA588, PA589, PA591, PA592, PA593, PA594, UD318, UD322, WA363                                                                                                                           | JQ866217 |
| PA875  | PA875, PA876, PA877                                                                                                                                                                                                                                                                                                                                                                                                                                                                                                | JQ866218 |
| PA1044 | KA1662, KA1665, KA1666, KA1667, KA1668, KA1669, KA1670, KA1671, KA1685, KA1687, PA1044, PA1045, PA1046, PA1047, PA1048, PA1049, PA1052, PA1053, PA1054, PA1055, PA1056, PA1057                                                                                                                                                                                                                                                                                                                                     | JQ866205 |
| PA1065 | PA1037, PA1038, PA1039, PA1040, PA1041, PA1042, PA1043, PA1051, PA1058, PA1059, PA1060, PA1061, PA1062, PA1063, PA1064, PA1065                                                                                                                                                                                                                                                                                                                                                                                     | JQ866206 |
| PA1573 | PA1573, PA1578, PA1584, PA1585, PA1586, PA1587, PA1588, PA1589, PA1592, PA1594, PA1596                                                                                                                                                                                                                                                                                                                                                                                                                             | JQ866207 |
| PA1574 | PA1574, PA1577, PA1593, PA1595, PA1597, PA1600                                                                                                                                                                                                                                                                                                                                                                                                                                                                     | JQ866208 |
| PA1581 | PA1581, PA1583, PA1590                                                                                                                                                                                                                                                                                                                                                                                                                                                                                             | JQ866209 |
| PA1591 | PA1575, PA1580, PA1591, PA1598, PA1599                                                                                                                                                                                                                                                                                                                                                                                                                                                                             | JQ866210 |
| PA3138 | PA3138, PA3139, PA3140, PA3141, PA3142, PA3143, PA3144, PA3145, PA3146, PA3147                                                                                                                                                                                                                                                                                                                                                                                                                                     | JQ866211 |
| PO137  | PO137                                                                                                                                                                                                                                                                                                                                                                                                                                                                                                              | JQ866219 |
| PO138  | PO138, PO139, PO140, PO141                                                                                                                                                                                                                                                                                                                                                                                                                                                                                         | JQ866220 |
| PO421  | PO421                                                                                                                                                                                                                                                                                                                                                                                                                                                                                                              | JQ866221 |
| PO422  | PO422                                                                                                                                                                                                                                                                                                                                                                                                                                                                                                              | JQ866222 |
| PO495  | PO495, PO496, UB598                                                                                                                                                                                                                                                                                                                                                                                                                                                                                                | JQ866223 |
| PO497  | PO497, UB1435, UB1439, UB1446, UB1454                                                                                                                                                                                                                                                                                                                                                                                                                                                                              | JQ866224 |
| RU1106 | RU1106, RU1108, WB2322                                                                                                                                                                                                                                                                                                                                                                                                                                                                                             | JQ866225 |
| UB434  | KO2725, UB434                                                                                                                                                                                                                                                                                                                                                                                                                                                                                                      | JQ866234 |
| UB437  | UB435, UB437                                                                                                                                                                                                                                                                                                                                                                                                                                                                                                       | JQ866235 |
| UB438  | KO2636, KO2638, KO2641, KO2642, KO2643, KO2644, KO2645, KO2650, KO2653, KO2655, KO2656, KO2842, KO2843, UB438, UB1429, UB1460, UB2039, UB2040, UB2041                                                                                                                                                                                                                                                                                                                                                              | JQ866236 |
| UB439  | UB439, UB440                                                                                                                                                                                                                                                                                                                                                                                                                                                                                                       | JQ866237 |
| UB442  | KO2635, KO2646, KO2647, KO2648, KO2654, KO2716, KO2717, KO2718, KO2719, KO2732, UB442, UB1431, UB2720, UB2721, UB2722, UB2723                                                                                                                                                                                                                                                                                                                                                                                      | JQ866238 |
| UB445  | BL1805, BL1810, KO2445, KO2446, KO2447, KO2448, KO2449, LU1823, LU2368, LU2372, LU2385, UB445, UB1456, UB1457, UB1458, UB1462, UB2043, UB2051, UB2053, UB2054, UB2060, UB2061                                                                                                                                                                                                                                                                                                                                      | JQ866239 |
| UB446  | KO2730, KO2738, KO2743, UB443, UB444, UB446, UB447, UB1432, UB1444, UB2737                                                                                                                                                                                                                                                                                                                                                                                                                                         | EU527411 |
| UB595  | UB595                                                                                                                                                                                                                                                                                                                                                                                                                                                                                                              | JQ866240 |
| UB596  | UB596, UB597, UB2042                                                                                                                                                                                                                                                                                                                                                                                                                                                                                               | JQ866241 |
| UB599  | UB599                                                                                                                                                                                                                                                                                                                                                                                                                                                                                                              | JQ866242 |
| UB601  | UB601, UB602, UB603, UB1436, UB2044, UB2045, UB2046, UB2047, UB2048, UB2049                                                                                                                                                                                                                                                                                                                                                                                                                                        | JQ866243 |
| UB1430 | UB1430                                                                                                                                                                                                                                                                                                                                                                                                                                                                                                             | JQ866226 |
| UB1433 | MU1655, MU1657, MU1659, MU1660, UB1433                                                                                                                                                                                                                                                                                                                                                                                                                                                                             | JQ866227 |
| UB1434 | KO2727, UB1434, UB1443, UB2735                                                                                                                                                                                                                                                                                                                                                                                                                                                                                     | JQ866228 |
| UB1447 | UB1447, UB1449, UB1451, UB1453                                                                                                                                                                                                                                                                                                                                                                                                                                                                                     | JQ866229 |
| UB2037 | UB2037                                                                                                                                                                                                                                                                                                                                                                                                                                                                                                             | JQ866230 |
| UB2038 | UB2038                                                                                                                                                                                                                                                                                                                                                                                                                                                                                                             | JQ866231 |
| UB2488 | UB2488, UB2489, UB2490, UB2491, UB2492, UB2493, UB2494, UB2495, UB2496, UB2497, UB2498, UB2499, UB2500, UB2501, UB2502                                                                                                                                                                                                                                                                                                                                                                                             | JQ866232 |
| UB2724 | KO2726, KO2731, KO2733, KO2736, KO2740, KO2745, KO2747, KO2748, KO2749, KO2750, KO2752, KO2753, KO2754, KO2756, KO2757, KO2758, KO2759, KO2761, KO2763, KO2765, KO2769, KO2770, KO2771, UB2724, UB2734, UB2742, UB2744, UB2746, UB2755, UB2760, UB2762, UB2764, UB2766, UB2767, UB2768                                                                                                                                                                                                                             | JQ866233 |
| UM389  | UM389, UM390                                                                                                                                                                                                                                                                                                                                                                                                                                                                                                       | JQ866246 |
| UM391  | UM391, WA394, WA395, WA396, WA398, WA399                                                                                                                                                                                                                                                                                                                                                                                                                                                                           | JQ866247 |
| UM499  | UM499, UM500, UM501                                                                                                                                                                                                                                                                                                                                                                                                                                                                                                | JQ866248 |
| UM1137 | UM1137                                                                                                                                                                                                                                                                                                                                                                                                                                                                                                             | JQ866244 |
| UM1145 | UM1145, UM1146, UM1147, UM1149, UM1150, UM1151, UM1152                                                                                                                                                                                                                                                                                                                                                                                                                                                             | JQ866245 |
| WA3    | WA3, WA4                                                                                                                                                                                                                                                                                                                                                                                                                                                                                                           | JQ866249 |
| WA343  | WA343, WA345, WA346, WA347, WA348, WA349, WA350                                                                                                                                                                                                                                                                                                                                                                                                                                                                    | JQ866250 |
| WA344  | WA344, WA351                                                                                                                                                                                                                                                                                                                                                                                                                                                                                                       | JQ866251 |
| WA357  | BA430, WA357, WA358                                                                                                                                                                                                                                                                                                                                                                                                                                                                                                | JQ866252 |
| WA359  | BA1387, WA359, WA361                                                                                                                                                                                                                                                                                                                                                                                                                                                                                               | JQ866253 |

|        |                                                                                                                                                                                                                                                                                                                                                                                                                                                                                                                                                                                                                                                                                                                                                                    |          |
|--------|--------------------------------------------------------------------------------------------------------------------------------------------------------------------------------------------------------------------------------------------------------------------------------------------------------------------------------------------------------------------------------------------------------------------------------------------------------------------------------------------------------------------------------------------------------------------------------------------------------------------------------------------------------------------------------------------------------------------------------------------------------------------|----------|
| WA392  | WA392, WA393, WA397                                                                                                                                                                                                                                                                                                                                                                                                                                                                                                                                                                                                                                                                                                                                                | JQ866254 |
| WA466  | WA466, WA467, WA468, WA469, WA470, WA471, WA472, WA473, WA474, WA475, WA476                                                                                                                                                                                                                                                                                                                                                                                                                                                                                                                                                                                                                                                                                        | EU527409 |
| WA543  | BF2159, BF2160, BF2161, WA539, WA540, WA541, WA542, WA543, WA550                                                                                                                                                                                                                                                                                                                                                                                                                                                                                                                                                                                                                                                                                                   | EU527415 |
| WA548  | WA548, WA561                                                                                                                                                                                                                                                                                                                                                                                                                                                                                                                                                                                                                                                                                                                                                       | JQ866255 |
| WA549  | AZ2165, BE951, BE1176, BE1177, BE1178, BE1179, BE1180, KA2196, WA549                                                                                                                                                                                                                                                                                                                                                                                                                                                                                                                                                                                                                                                                                               | JQ866256 |
| WA554  | BE1182, BE1187, BE1188, BE1190, KA2179, KA2185, KA2219, KA2220, KA2225, KA2246, KA2251, LU2521, LU2522, LU2523, LU2524, LU2525, LU2527, LU2528, LU2530, LU2532, LU2533, LU2534, LU2535, LU2536, LU2537, LU2538, LU2540, LU2541, LU2542, LU2543, LU2544, LU2545, LU2546, LU2547, LU2548, LU2549, LU2550, LU2551, LU2553, LU2554, LU2557, MO2132, MO2133, WA554, WA555, WA556, WA557, WA558, WA559, WA560, WA562, WA563                                                                                                                                                                                                                                                                                                                                              | JQ866257 |
| WA624  | WA624, WA625, WA626, WA627, WA628, WA634, WA635, WA637, WA638, WA639, WA641, WA642, WA643, WA644                                                                                                                                                                                                                                                                                                                                                                                                                                                                                                                                                                                                                                                                   | JQ866258 |
| WA629  | WA629                                                                                                                                                                                                                                                                                                                                                                                                                                                                                                                                                                                                                                                                                                                                                              | JQ866259 |
| WB412  | RU1124, WB412, WB416, WB417, WB1132, WB2317, WB2319                                                                                                                                                                                                                                                                                                                                                                                                                                                                                                                                                                                                                                                                                                                | JQ866262 |
| WB413  | WB413, WB414, WB418, WB1096, WB1097, WB1098, WB1099, WB1100, WB1101, WB1102, WB1103, WB1104, WB1105, WB2312, WB2313, WB2315, WB2316, WB2318, WB2331, WB2338                                                                                                                                                                                                                                                                                                                                                                                                                                                                                                                                                                                                        | JQ866263 |
| WB415  | WB415, WB419                                                                                                                                                                                                                                                                                                                                                                                                                                                                                                                                                                                                                                                                                                                                                       | JQ866264 |
| WB690  | WB690, WB691, WB692                                                                                                                                                                                                                                                                                                                                                                                                                                                                                                                                                                                                                                                                                                                                                | JQ866266 |
| WB693  | RU1109, RU1112, RU1122, RU1127, RU1128, WB693, WB1115, WB1130, WB1133, WB1136, WB2330, WB2334, WB2339, WB2341                                                                                                                                                                                                                                                                                                                                                                                                                                                                                                                                                                                                                                                      | JQ866267 |
| WB713  | WB713, WB2321, WB2325, WB2328, WB2332                                                                                                                                                                                                                                                                                                                                                                                                                                                                                                                                                                                                                                                                                                                              | JQ866265 |
| WB1094 | WB1094                                                                                                                                                                                                                                                                                                                                                                                                                                                                                                                                                                                                                                                                                                                                                             | JQ866260 |
| WB2337 | WB2337                                                                                                                                                                                                                                                                                                                                                                                                                                                                                                                                                                                                                                                                                                                                                             | JQ866261 |
| WK2    | WK2, WK21                                                                                                                                                                                                                                                                                                                                                                                                                                                                                                                                                                                                                                                                                                                                                          | JQ866271 |
| WK4    | WK3, WK4, WK5, WK10                                                                                                                                                                                                                                                                                                                                                                                                                                                                                                                                                                                                                                                                                                                                                | EU527385 |
| WK7    | WK6, WK7, WK14, WK16, WK20, WK23, WK25                                                                                                                                                                                                                                                                                                                                                                                                                                                                                                                                                                                                                                                                                                                             | EU527386 |
| WK8    | WK1, WK8, WK9, WK11, WK13, WK24                                                                                                                                                                                                                                                                                                                                                                                                                                                                                                                                                                                                                                                                                                                                    | EU527387 |
| WK12   | WK12, WK17                                                                                                                                                                                                                                                                                                                                                                                                                                                                                                                                                                                                                                                                                                                                                         | EU527456 |
| WK18   | WK18, WK22                                                                                                                                                                                                                                                                                                                                                                                                                                                                                                                                                                                                                                                                                                                                                         | JQ866270 |
| WK2841 | WK2841                                                                                                                                                                                                                                                                                                                                                                                                                                                                                                                                                                                                                                                                                                                                                             | JQ866272 |
| WL98   | WL98                                                                                                                                                                                                                                                                                                                                                                                                                                                                                                                                                                                                                                                                                                                                                               | EU527444 |
| WL100  | WL100, WL101                                                                                                                                                                                                                                                                                                                                                                                                                                                                                                                                                                                                                                                                                                                                                       | EU527447 |
| WL102  | KA1417, KA1418, KA1419, KA1420, KA1421, KA1422, KA1423, KA1424, KA1425, KA1426, WL102                                                                                                                                                                                                                                                                                                                                                                                                                                                                                                                                                                                                                                                                              | EU527452 |
| WL103  | WL103                                                                                                                                                                                                                                                                                                                                                                                                                                                                                                                                                                                                                                                                                                                                                              | EU527450 |
| WL104  | WL104                                                                                                                                                                                                                                                                                                                                                                                                                                                                                                                                                                                                                                                                                                                                                              | EU527451 |
| WL105  | BA775, BA1215, BA1216, BA1217, BA1218, BA1219, BA1220, BA1221, BA1222, BA1223, BA1224, BA1225, BA1226, BA1227, BA1228, BA1229, BA1230, BA1231, BA1232, BA1233, BA1234, BA1264, BA1265, BA1266, BA1267, BA1268, BA1269, BA1270, BA1271, BA1272, BA1273, BA1274, BA1275, BA1276, BA1277, BA1278, BA1296, BA1297, BA1368, BA1371, BA1380, BA1382, BA1385, BA1386, BA1390, BA1395, BA1397, BA1407, BA1408, BA1604, BA1605, BA1606, BA1607, BA1609, BA1728, BA1731, BA1735, BE1181, BI56, BI57, BI60, BI63, BI66, BI80, BI81, BI91, BI2415, BI2416, OP2149, OP2150, UM502, UM503, UM504, UM505, UM506, UM507, UM508, UM509, UM510, WA35, WA39, WA41, WA44, WA45, WA46, WA47, WA48, WA49, WA50, WA51, WA52, WA53, WA521, WA533, WA534, WA535, WA536, WA537, WA538, WL105 | EU527448 |
| WL107  | WL107, WL115, WL124                                                                                                                                                                                                                                                                                                                                                                                                                                                                                                                                                                                                                                                                                                                                                | EU527453 |
| WL108  | WL108, WL127, WL130                                                                                                                                                                                                                                                                                                                                                                                                                                                                                                                                                                                                                                                                                                                                                | EU527445 |
| WL109  | AM286, AM287, AM292, AM293, AM297, AM298, AM304, AM305, KA871, KA874, LU1824, LU1826, LU1827, LU1828, LU1829, LU1830, LU1831, LU1832, LU1833, LU1834, LU1835, LU1837, LU1838, LU1839, LU1841, LU1842, LU1843, LU1844, LU1845, LU1846, LU1847, LU1848, LU1849, LU1850, LU1851, LU1853, LU1856, LU1919, LU1920, LU1921, LU1922, LU1923, LU1924, LU1925, LU1926, LU1927, LU1928, LU1929, LU1930, LU1931, LU1932, LU1933, LU1934, LU1935, LU1936, LU1937, LU1938, LU1939, LU1940, LU1941, OP3369, OP3370, OP3371, OP3372, OP3373, OP3374, OP3375, OP3376, OP3377, OP3378, OP3379, OP3380, OP3381, OP3382, OP3383, OP3384, OP3385, OP3386, OP3387, OP3388, OP3389, OP3390, OP3391, OP3392, OP3393, WK19, WL109, WL118, WL121, WL122, WL233                              | EU527446 |
| WL111  | BI250, BI251, BI255, BI257, BI258, BI264, BI269, BI270, BI272, BI277, BI280, LU1705, LU1706, LU1707, LU1708, LU1709, LU1710, LU1711, LU1712, LU1713, LU1714, LU1715, LU1716, LU1717, LU1718, LU1719, WL106, WL111, WL112, WL113, WL119, WL120, WL123, WL125, WL126, WL128, WL131, WL132, WL227, WL228, WL231                                                                                                                                                                                                                                                                                                                                                                                                                                                       | EU527455 |
| WL114  | WL114, WL116                                                                                                                                                                                                                                                                                                                                                                                                                                                                                                                                                                                                                                                                                                                                                       | EU527449 |
| BJ688  | BJ688, BJ689                                                                                                                                                                                                                                                                                                                                                                                                                                                                                                                                                                                                                                                                                                                                                       | JQ866273 |
| IK2876 | BN3016, BN3018, BN3023, BN3025, BN3030, BN3035, BN3036, BN3037, BN3038, BN3039, BN3040, BN3042, BN3043, BN3051, BN3053, BN3057, BN3059, BN3060, BN3061, BN3095, BN3099, BN3105, BN3118, BN3125, IK2876, IK2877, IK2880, IK2882, IK2883, IK2889, IK2894, IK2898, IK2902, IK2903, IK2912, IK2913, IK2914, IK2915, IK2919, IK2927, IK2928, KR21, KR33, KR38, KR50, KR51, KR76, KR77                                                                                                                                                                                                                                                                                                                                                                                   | JQ866274 |
| IK2879 | BN3024, BN3055, BN3056, BN3096, BN3101, BN3110, BN3111, IK2879, IK2890, IK2916                                                                                                                                                                                                                                                                                                                                                                                                                                                                                                                                                                                                                                                                                     | JQ866275 |
| IK2885 | BN3014, BN3021, BN3045, BN3046, BN3048, BN3054, BN3107, BN3128, BN3129, IK2885, IK2887, IK2896, IK2907, IK2918, IK2923                                                                                                                                                                                                                                                                                                                                                                                                                                                                                                                                                                                                                                             | JQ866276 |
| KR2    | KR2, KR16, KR25, KR40, KR47                                                                                                                                                                                                                                                                                                                                                                                                                                                                                                                                                                                                                                                                                                                                        | JQ866277 |
| KR3    | BN3015, BN3020, BN3032, BN3041, BN3047, BN3058, BN3100, BN3114, BN3115, BN3124, BN3127, BN3130, BN3132, IK2925, IK2926, KR3, KR4, KR7, KR11, KR12, KR13, KR18, KR20, KR32, KR37, KR42, KR43, KR46, KR57, KR58, KR64, KR65, KR70, KR75, KR78                                                                                                                                                                                                                                                                                                                                                                                                                                                                                                                        | JQ866278 |
| KR5    | BN3028, BN3049, BN3063, BN3094, BN3097, BN3098, BN3104, BN3106, BN3108, BN3109, BN3136, BN3137, IK2878, IK2895, IK2905, IK2908, IK2910, IK2911, KR5, KR14, KR15, KR19, KR26, KR30, KR34, KR35, KR36, KR44, KR45, KR56, KR59, KR60, KR61, KR62, KR63                                                                                                                                                                                                                                                                                                                                                                                                                                                                                                                | JQ866282 |
| KR6    | BN3026, BN3027, BN3031, BN3044, BN3050, BN3064, BN3065, BN3102, BN3117, BN3120, BN3121, BN3134, BN3135, IK2899, IK2901, KR6, KR17, KR24                                                                                                                                                                                                                                                                                                                                                                                                                                                                                                                                                                                                                            | JQ866284 |
| KR10   | BN3019, BN3022, BN3029, BN3033, BN3034, BN3122, IK2891, IK2906, IK2920, KR10, KR22, KR27, KR39, KR54, KR67                                                                                                                                                                                                                                                                                                                                                                                                                                                                                                                                                                                                                                                         | JQ866279 |



|        |                                                                                                                                                                                                                                                                                                                                                                                                                                                                                                                                                                                                                                                                                                                                                                                                                                                                                                       |          |
|--------|-------------------------------------------------------------------------------------------------------------------------------------------------------------------------------------------------------------------------------------------------------------------------------------------------------------------------------------------------------------------------------------------------------------------------------------------------------------------------------------------------------------------------------------------------------------------------------------------------------------------------------------------------------------------------------------------------------------------------------------------------------------------------------------------------------------------------------------------------------------------------------------------------------|----------|
| KR23   | KR23, KR31, KR41, KR52, KR53, KR74                                                                                                                                                                                                                                                                                                                                                                                                                                                                                                                                                                                                                                                                                                                                                                                                                                                                    | JQ866280 |
| KR48   | KR48                                                                                                                                                                                                                                                                                                                                                                                                                                                                                                                                                                                                                                                                                                                                                                                                                                                                                                  | JQ866281 |
| KR66   | KR66                                                                                                                                                                                                                                                                                                                                                                                                                                                                                                                                                                                                                                                                                                                                                                                                                                                                                                  | JQ866283 |
| KR73   | KR73                                                                                                                                                                                                                                                                                                                                                                                                                                                                                                                                                                                                                                                                                                                                                                                                                                                                                                  | JQ866285 |
| LK645  | LK645, LK651, LK670, LK674                                                                                                                                                                                                                                                                                                                                                                                                                                                                                                                                                                                                                                                                                                                                                                                                                                                                            | JQ866286 |
| LK646  | LK646, LK653, LK657, LK658, LK662, LK666, LK671, LK678, LK685, ML5475, ML5476, ML5478, ML5479, ML5484, ML5485, JQ866287<br>ML5528, ML5530, ML5531, ML5543, ML5544, ML5545, ML5546, ML5547, ML5548, ML5551, ML5552, ML5553, ML5604,<br>ML5605, ML5611, ML5612, ML5613, ML5624, ML5640, ML5642, ML5644, ML5648, ML5652, ML5657, ML5666, ML5667,<br>ML5669, ML5672, ML5673, ML5676, ML5678, ML5681, ML5700, ML5706, ML5718, ML5725, ML5731                                                                                                                                                                                                                                                                                                                                                                                                                                                               |          |
| LK647  | LK647, LK649, LK667, ML5472, ML5481, ML5491, ML5492, ML5493, ML5494, ML5498, ML5501, ML5502, ML5504,<br>ML5512, ML5513, ML5518, ML5520, ML5523, ML5540, ML5549, ML5550, ML5557, ML5559, ML5567, ML5568, ML5572,<br>ML5574, ML5578, ML5580, ML5581, ML5582, ML5594, ML5595, ML5598, ML5606, ML5608, ML5609, ML5618, ML5619,<br>ML5620, ML5622, ML5627, ML5634, ML5639, ML5645, ML5651, ML5655, ML5656, ML5659, ML5664, ML5688, ML5689,<br>ML5695, ML5696, ML5702, ML5708, ML5710, ML5711, ML5721, ML5724, ML5737                                                                                                                                                                                                                                                                                                                                                                                       | JQ866288 |
| LK648  | LK648, LK654, LK676, LK677, LK679, LK680, LK681, LK682, LK686, LK687                                                                                                                                                                                                                                                                                                                                                                                                                                                                                                                                                                                                                                                                                                                                                                                                                                  | JQ866289 |
| LK650  | LK650, LK661, LK683, LK684                                                                                                                                                                                                                                                                                                                                                                                                                                                                                                                                                                                                                                                                                                                                                                                                                                                                            | JQ866290 |
| LK652  | LK652, LK659, LK663, LK665                                                                                                                                                                                                                                                                                                                                                                                                                                                                                                                                                                                                                                                                                                                                                                                                                                                                            | JQ866291 |
| LK664  | KR68, KR69, LK664, LK668, LK672                                                                                                                                                                                                                                                                                                                                                                                                                                                                                                                                                                                                                                                                                                                                                                                                                                                                       | JQ866292 |
| LK673  | LK673, ML5473, ML5474, ML5477, ML5480, ML5482, ML5483, ML5486, ML5489, ML5497, ML5499, ML5500, ML5503,<br>ML5506, ML5507, ML5508, ML5509, ML5510, ML5511, ML5514, ML5516, ML5517, ML5521, ML5522, ML5524, ML5526,<br>ML5529, ML5532, ML5534, ML5535, ML5536, ML5541, ML5554, ML5555, ML5558, ML5560, ML5561, ML5562, ML5566,<br>ML5570, ML5571, ML5573, ML5579, ML5583, ML5584, ML5585, ML5591, ML5592, ML5593, ML5597, ML5600, ML5607,<br>ML5615, ML5616, ML5617, ML5623, ML5625, ML5626, ML5629, ML5630, ML5633, ML5635, ML5641, ML5647, ML5649,<br>ML5653, ML5654, ML5658, ML5660, ML5661, ML5662, ML5663, ML5665, ML5668, ML5670, ML5675, ML5677, ML5679,<br>ML5680, ML5682, ML5683, ML5684, ML5685, ML5692, ML5693, ML5697, ML5698, ML5699, ML5703, ML5704, ML5705,<br>ML5707, ML5709, ML5714, ML5715, ML5716, ML5717, ML5719, ML5720, ML5722, ML5728, ML5732, ML5733, ML5735,<br>ML5736, ML5739 | JQ866293 |
| ML5487 | ML5487, ML5488, ML5496, ML5519, ML5537, ML5538, ML5539, ML5575, ML5576, ML5586, ML5587, ML5588, ML5589,<br>ML5590, ML5596, ML5614, ML5621, ML5636, ML5643, ML5646, ML5650, ML5674, ML5687, ML5712, ML5713, ML5726                                                                                                                                                                                                                                                                                                                                                                                                                                                                                                                                                                                                                                                                                     | JQ866294 |
| ML5490 | ML5490, ML5495, ML5515, ML5542, ML5563, ML5565, ML5599, ML5631, ML5637, ML5686, ML5690, ML5723, ML5730                                                                                                                                                                                                                                                                                                                                                                                                                                                                                                                                                                                                                                                                                                                                                                                                | JQ866295 |
| ML5505 | ML5505, ML5525, ML5527, ML5533, ML5556, ML5564, ML5569, ML5577, ML5601, ML5602, ML5603, ML5610, ML5628,<br>ML5638, ML5694, ML5727, ML5729                                                                                                                                                                                                                                                                                                                                                                                                                                                                                                                                                                                                                                                                                                                                                             | JQ866296 |

<sup>1</sup>All primate fecal samples were subjected to mtDNA analysis to confirm their species and subspecies origin, and to exclude specimen degradation.

The resulting sequences (479 bp D loop fragment) were aligned and grouped into unique mtDNA haplotypes. Samples are coded according to their field site of origin (as shown in Figure 1). A neighbor joining tree of mtDNA sequences is shown in Figure S1.

<sup>2</sup>Fecal samples from *P. t. schweinfurthii* are shown in black; SIVcpz antibody and/or nucleic acid positive samples are highlighted in red, with samples containing viral RNA sequences shown in boldface; fecal samples from *Pan paniscus* are shown in grey.

**Table S3. Enumeration of SIVcpz infected eastern chimpanzees using microsatellite analyses**

| Chimp <sup>1</sup> | Fecal sample | Collection date<br>mm/dd/yy | mtDNA<br>haplotype | Sex <sup>2</sup> | Microsatellite loci <sup>3</sup> |         |         |         | SIVcpz                   |                             | PCR amplicon (bp) <sup>6</sup> |                      |                      |                           |             |                            |
|--------------------|--------------|-----------------------------|--------------------|------------------|----------------------------------|---------|---------|---------|--------------------------|-----------------------------|--------------------------------|----------------------|----------------------|---------------------------|-------------|----------------------------|
|                    |              |                             |                    |                  | D18s536                          | D4s243  | D10s676 | D9s922  | fecal<br>WB <sup>4</sup> | SIVcpz<br>vRNA <sup>5</sup> | <i>gag</i>                     | <i>pol</i><br>(long) | <i>pol</i><br>(mini) | <i>vpu/</i><br><i>env</i> | <i>gp41</i> | <i>gp41/</i><br><i>nef</i> |
| AM1                | AM205        | 01/15/05                    | AM205              | M                | 139/151                          | 234/234 | 179/183 | 294/302 | pos                      | neg                         |                                |                      |                      |                           |             |                            |
|                    | AM208        | 02/27/05                    | AM205              | M                | 139/151                          | 234/234 | 179/183 | 294/302 | pos                      | neg                         |                                |                      |                      |                           |             |                            |
|                    | AM209        | 02/27/05                    | AM205              | M                | 139/151                          | 234/234 | 179/183 | 294/302 | pos                      | neg                         |                                |                      |                      |                           |             |                            |
|                    | AM210        | 02/27/05                    | AM205              | M                | 139/151                          | 234/234 | 179/183 | 294/302 | pos                      | neg                         |                                |                      |                      |                           |             |                            |
|                    | AM211        | 02/27/05                    | AM205              | M                | 139/151                          | 234/234 | 179/183 | 294/302 | pos                      | neg                         |                                |                      |                      |                           |             |                            |
|                    | AM213        | 02/27/05                    | AM205              | M                | 139/151                          | 234/234 | 179/183 | 294/302 | pos                      | pos                         |                                |                      |                      |                           |             | 731                        |
| AM2                | AM214        | 02/27/05                    | AM205              | M                | 139/151                          | 234/234 | 179/183 | 294/302 | pos                      | neg                         |                                |                      |                      |                           |             |                            |
|                    | AM286        | 07/20/05                    | WL109              | M                | 151/155                          | 210/226 | 175/183 | 286/306 | pos                      | pos                         |                                |                      |                      |                           |             | 325                        |
|                    | AM287        | 07/20/05                    | WL109              | M                | 151/155                          | 210/226 | 175/183 | 286/306 | pos                      | neg                         |                                |                      |                      |                           |             |                            |
|                    | AM292        | 07/23/05                    | WL109              | M                | 151/155                          | 210/226 | 175/183 | 286/306 | pos                      | neg                         |                                |                      |                      |                           |             |                            |
|                    | AM293        | 07/23/05                    | WL109              | M                | 151/155                          | 210/226 | 175/183 | 286/306 | pos                      | pos                         |                                |                      | 232                  |                           |             |                            |
|                    | AM297        | 07/30/05                    | WL109              | M                | 151/155                          | 210/226 | 175/183 | 286/306 | pos                      | neg                         |                                |                      |                      |                           |             |                            |
| AM3                | AM304        | 08/04/05                    | WL109              | M                | 151/155                          | 210/226 | 175/183 | 286/306 | pos                      | neg                         |                                |                      |                      |                           |             |                            |
|                    | AM298        | 07/30/05                    | WL109              | M                | 151/155                          | 210/230 | 171/175 | 298/306 | pos                      | neg                         |                                |                      |                      |                           |             |                            |
| AZ1                | AM305        | 08/04/05                    | WL109              | M                | 151/155                          | 210/230 | 171/175 | 298/306 | pos                      | neg                         |                                |                      |                      |                           |             |                            |
|                    | AZ2162       | 09/05/07                    | AZ2162             | M                | 135/151                          | 230/--- | 167/175 | ---/--- | pos                      | neg                         |                                |                      |                      |                           |             |                            |
| AZ2                | AZ2163       | 09/07/07                    | AZ2162             | n/a              | 135/151                          | 230/234 | 167/175 | ---/--- | pos                      | neg                         |                                |                      |                      |                           |             |                            |
|                    | AZ2164       | 09/07/07                    | AZ2162             | M                | 135/143                          | ---/--- | 175/183 | ---/302 | pos                      | neg                         |                                |                      |                      |                           |             |                            |
| BA1                | AZ2169       | 09/12/07                    | AZ2162             | M                | 135/143                          | ---/--- | 175/183 | 298/302 | pos                      | neg                         |                                |                      |                      |                           |             |                            |
|                    | BA432        | 01/09/06                    | BA432              | M                | 139/143                          | 190/230 | 171/183 | 286/294 | pos                      | pos                         |                                |                      | 219                  |                           |             |                            |
| BA2                | BA433        | 01/10/06                    | BA432              | M                | 139/143                          | 190/230 | 171/183 | 286/294 | pos                      | neg                         |                                |                      |                      |                           |             |                            |
|                    | BA807        | 08/13/06                    | KS2                | n/a              | 139/151                          | 190/194 | 179/187 | 290/306 | pos                      | neg                         |                                |                      |                      |                           |             |                            |
|                    | BA808        | 08/13/06                    | KS2                | n/a              | 139/151                          | 190/194 | 179/187 | 290/306 | pos                      | neg                         |                                |                      |                      |                           |             |                            |
|                    | BA809        | 08/14/06                    | KS2                | n/a              | 139/151                          | 190/194 | 179/187 | 290/306 | pos                      | neg                         |                                |                      |                      |                           |             |                            |
|                    | BA810        | 08/16/06                    | KS2                | n/a              | 139/151                          | 190/--- | 179/187 | ---/306 | pos                      | neg                         |                                |                      |                      |                           |             |                            |
|                    | BA811        | 08/16/06                    | KS2                | n/a              | 139/151                          | 190/194 | 179/187 | 290/306 | pos                      | neg                         |                                |                      |                      |                           |             |                            |
|                    | BA812        | 08/19/06                    | KS2                | n/a              | 139/151                          | 190/194 | 179/187 | 290/306 | pos                      | neg                         |                                |                      |                      |                           |             |                            |
|                    | BA813        | 08/19/06                    | KS2                | n/a              | 139/151                          | 190/194 | 179/187 | 290/306 | pos                      | neg                         |                                |                      |                      |                           |             |                            |
|                    | BA814        | 08/21/06                    | KS2                | n/a              | 139/151                          | 190/194 | 179/187 | 290/306 | pos                      | neg                         |                                |                      |                      |                           |             |                            |
|                    | BA815        | 08/22/06                    | KS2                | n/a              | 139/151                          | 190/194 | 179/187 | 290/306 | pos                      | neg                         |                                |                      |                      |                           |             |                            |
|                    | BA816        | 08/23/06                    | KS2                | n/a              | 139/151                          | 190/194 | 179/187 | 290/306 | pos                      | neg                         |                                |                      |                      |                           |             |                            |
|                    | BA817        | 09/07/06                    | KS2                | n/a              | 139/151                          | 190/194 | 179/187 | 290/306 | pos                      | neg                         |                                |                      |                      |                           |             |                            |
|                    | BA818        | 09/07/06                    | KS2                | n/a              | 139/151                          | 190/194 | 179/187 | 290/306 | pos                      | neg                         |                                |                      |                      |                           |             |                            |
|                    | BA819        | 09/09/06                    | KS2                | n/a              | 139/151                          | 190/194 | 179/187 | 290/306 | pos                      | neg                         |                                |                      |                      |                           |             |                            |
|                    | BA820        | 09/09/06                    | KS2                | n/a              | 139/151                          | 190/194 | 179/187 | 290/306 | pos                      | neg                         |                                |                      |                      |                           |             |                            |
|                    | BA821        | 09/09/06                    | KS2                | n/a              | 139/151                          | 190/194 | 179/187 | 290/306 | pos                      | neg                         |                                |                      |                      |                           |             |                            |
|                    | BA822        | 09/11/06                    | KS2                | n/a              | 139/151                          | 190/194 | 179/187 | 290/306 | pos                      | neg                         |                                |                      |                      |                           |             |                            |
|                    | BA823        | 09/11/06                    | KS2                | n/a              | 139/151                          | 190/194 | 179/187 | 290/306 | pos                      | neg                         |                                |                      |                      |                           |             |                            |
|                    | BA824        | 09/11/06                    | KS2                | n/a              | 139/151                          | 190/194 | 179/187 | 290/306 | pos                      | neg                         |                                |                      |                      |                           |             |                            |
|                    | BA825        | 09/12/06                    | KS2                | n/a              | 139/151                          | 190/194 | 179/187 | 290/306 | pos                      | neg                         |                                |                      |                      |                           |             |                            |
| BA826              | 09/12/06     | KS2                         | n/a                | 139/151          | 190/194                          | 179/187 | 290/306 | pos     | neg                      |                             |                                |                      |                      |                           |             |                            |
| BA827              | 09/12/06     | KS2                         | n/a                | 139/151          | 190/194                          | 179/187 | 290/306 | pos     | neg                      |                             |                                |                      |                      |                           |             |                            |
| BA3                | BA1019       | 10/17/06                    | BA1019             | M                | 151/155                          | 202/--- | 179/183 | 290/302 | pos                      | neg                         |                                |                      |                      |                           |             |                            |
|                    | BA1021       | 10/19/06                    | BA1019             | M                | 151/155                          | 202/230 | 179/183 | 290/302 | pos                      | neg                         |                                |                      |                      |                           |             |                            |
|                    | BA1022       | 11/14/06                    | BA1019             | n/a              | 151/155                          | 202/--- | 179/--- | 290/302 | pos                      | neg                         |                                |                      |                      |                           |             |                            |
|                    | BA1023       | 11/14/06                    | BA1019             | M                | 151/155                          | 202/230 | 179/183 | ---/302 | pos                      | neg                         |                                |                      |                      |                           |             |                            |
|                    | BA1024       | 11/14/06                    | BA1019             | M                | 151/155                          | 202/230 | 179/183 | 290/302 | pos                      | neg                         |                                |                      |                      |                           |             |                            |
|                    | BA1025       | 11/17/06                    | BA1019             | M                | 151/155                          | 202/230 | 179/183 | 290/302 | pos                      | neg                         |                                |                      |                      |                           |             |                            |
|                    | BA1026       | 11/17/06                    | BA1019             | M                | 151/155                          | 202/230 | 179/183 | 290/302 | pos                      | neg                         |                                |                      |                      |                           |             |                            |
|                    | BA1029       | 11/21/06                    | BA1019             | M                | 151/155                          | 202/230 | 179/183 | 290/302 | pos                      | neg                         |                                |                      |                      |                           |             |                            |
|                    | BA1030       | 11/21/06                    | BA1019             | M                | 151/155                          | 202/230 | 179/183 | 290/302 | pos                      | neg                         |                                |                      |                      |                           |             |                            |
|                    | BA1031       | 11/21/06                    | BA1019             | M                | 151/155                          | 202/230 | 179/183 | 290/302 | pos                      | neg                         |                                |                      |                      |                           |             |                            |
| BA1034             | 11/26/06     | BA1019                      | M                  | 151/155          | 202/230                          | 179/183 | 290/302 | pos     | neg                      |                             |                                |                      |                      |                           |             |                            |
| BA1035             | 11/26/06     | BA1019                      | M                  | 151/155          | 202/230                          | 179/183 | 290/302 | pos     | neg                      |                             |                                |                      |                      |                           |             |                            |
| BA4                | BA1020       | 10/19/06                    | BA1019             | M                | 135/155                          | 202/230 | 179/183 | 290/302 | pos                      | neg                         |                                |                      |                      |                           |             |                            |
|                    | BA1027       | 11/17/06                    | BA1019             | M                | 135/155                          | 202/230 | 179/183 | 290/302 | pos                      | neg                         |                                |                      |                      |                           |             |                            |
|                    | BA1028       | 11/17/06                    | BA1019             | M                | 135/155                          | 202/230 | 179/183 | 290/302 | pos                      | neg                         |                                |                      |                      |                           |             |                            |
| BA5                | BA1290       | 02/20/07                    | BA1290             | M                | 143/155                          | 198/230 | 179/195 | 286/302 | pos                      | neg                         |                                |                      |                      |                           |             |                            |
| BF1                | BF1161       | 12/04/06                    | BF1167             | M                | 151/155                          | 226/234 | 171/187 | 298/302 | pos                      | pos                         |                                |                      |                      | 421                       | 729         |                            |
|                    | BF1162       | 12/04/06                    | BF1167             | M                | 151/155                          | 226/234 | 171/187 | 298/302 | pos                      | pos                         |                                |                      |                      | 421                       | 729         |                            |
|                    | BF1163       | 12/04/06                    | BF1167             | M                | 151/155                          | 226/234 | 171/187 | 298/302 | pos                      | pos                         |                                |                      |                      | 421                       | 729         |                            |
|                    | BF1164       | 12/04/06                    | BF1167             | M                | 151/155                          | 226/234 | 171/187 | 298/302 | pos                      | pos                         |                                |                      |                      | 421                       | 729         |                            |

|      |        |          |        |     |         |         |         |         |     |     |     |     |     |     |     |      |
|------|--------|----------|--------|-----|---------|---------|---------|---------|-----|-----|-----|-----|-----|-----|-----|------|
|      | BF1165 | 12/04/06 | BF1167 | M   | 151/155 | 226/234 | 171/187 | 298/302 | pos | pos |     |     |     |     | 421 | 729  |
|      | BF1166 | 12/23/06 | BF1167 | M   | 151/155 | 226/234 | 171/187 | 298/302 | pos | pos |     |     |     |     | 421 | 729  |
|      | BF1167 | 12/23/06 | BF1167 | M   | 151/155 | 226/234 | 171/187 | 298/302 | pos | pos | FL  | FL  | FL  | FL  | FL  | FL   |
|      | BF1168 | 12/23/06 | BF1167 | M   | 151/155 | 226/234 | 171/187 | 298/302 | pos | pos |     |     |     |     | 421 | 729  |
|      | BF1169 | 12/23/06 | BF1167 | M   | 151/155 | 226/234 | 171/187 | 298/302 | pos | pos |     |     |     |     | 421 | 729  |
|      | BF1170 | 12/23/06 | BF1167 | M   | 151/155 | 226/234 | 171/187 | 298/302 | pos | pos |     |     |     |     | 421 | 729  |
|      | BF1171 | 12/23/06 | BF1167 | M   | 151/155 | 226/234 | 171/187 | 298/302 | pos | pos |     |     |     |     | 421 | 729  |
|      | BF1172 | 12/23/06 | BF1167 | M   | 151/155 | 226/234 | 171/187 | 298/302 | pos | pos |     |     |     |     | 421 | 729  |
| BL1  | BL1805 | 04/18/07 | UB445  | M   | 139/151 | 190/234 | 183/187 | 298/302 | pos | pos |     |     | 232 | 520 | 429 |      |
|      | BL1810 | 04/18/07 | UB445  | M   | 139/151 | 190/234 | 183/187 | 298/302 | pos | pos |     |     | 232 |     | 429 |      |
| BL2  | BL1804 | 04/18/07 | BL1804 | M   | 143/155 | 190/226 | 183/187 | 294/298 | pos | neg |     |     |     |     |     |      |
| BU1  | BU203  | 12/28/04 | BU203  | M   | 147/151 | 234/238 | 155/183 | 298/302 | pos | neg |     |     |     |     |     |      |
| EP1  | EP479  | 02/13/06 | EP479  | M   | 151/155 | 190/234 | 175/179 | 290/294 | pos | neg |     |     |     |     |     |      |
|      | EP480  | 02/13/06 | EP479  | M   | 151/155 | 190/234 | 175/179 | 290/294 | pos | neg |     |     |     |     |     |      |
| EP2  | EP482  | 01/30/06 | EP486  | n/a | 139/147 | 194/226 | 179/187 | 298/302 | pos | pos |     |     | 232 |     | 432 | 730  |
|      | EP483  | 01/30/06 | EP486  | n/a | 139/147 | 194/226 | 179/187 | 298/302 | pos | pos |     |     | 232 |     |     |      |
|      | EP484  | 02/02/06 | EP486  | n/a | 139/147 | 194/226 | 179/187 | 298/302 | pos | neg |     |     |     |     |     |      |
|      | EP485  | 02/06/06 | EP486  | n/a | 139/147 | 194/226 | 179/187 | 298/302 | pos | pos |     | 892 | 232 |     | 432 |      |
|      | EP486  | 02/07/06 | EP486  | n/a | 139/147 | 194/226 | 179/187 | 298/302 | pos | pos |     |     | 232 |     |     | 730  |
| KA1  | KA2198 | 09/24/07 | KS9    | M   | 135/139 | 198/234 | 179/191 | 298/302 | pos | pos |     |     | 232 |     |     |      |
|      | KA2201 | 09/24/07 | KS9    | M   | 135/139 | 214/234 | 179/191 | 286/302 | pos | pos |     |     | 232 |     |     |      |
|      | KA2206 | 09/28/07 | KS9    | M   | 135/139 | 214/234 | 179/191 | 286/302 | pos | pos |     |     | 232 |     |     |      |
|      | KA2210 | 09/30/07 | KS9    | M   | 135/139 | 214/234 | 179/191 | 286/302 | pos | neg |     |     |     |     |     |      |
|      | KA2222 | 09/12/07 | KS9    | n/a | 135/139 | 214/234 | 179/191 | 286/302 | pos | pos | 560 | 892 | 232 | 502 |     |      |
|      | KA2235 | 09/21/07 | KS9    | M   | 135/139 | 214/234 | 179/191 | 286/302 | pos | pos | 560 |     | 232 |     | 418 | 806  |
| KA2  | KA871  | 09/10/06 | WL109  | M   | 135/139 | 190/194 | 179/183 | 286/302 | pos | neg |     |     |     |     |     |      |
|      | KA874  | 10/21/06 | WL109  | M   | 135/139 | ---/194 | 179/183 | 286/302 | pos | neg |     |     |     |     |     |      |
| KA3  | KA385  | 12/17/05 | KA385  | M   | 135/139 | 214/214 | 171/187 | 298/302 | pos | neg |     |     |     |     |     |      |
|      | KA386  | 12/17/05 | KA385  | M   | 135/139 | 214/214 | 171/187 | 298/302 | pos | neg |     |     |     |     |     |      |
| KA4  | KA868  | 08/28/06 | KA868  | M   | 139/143 | 214/226 | 183/195 | 294/298 | pos | neg |     |     |     |     |     |      |
|      | KA870  | 09/06/06 | KA868  | M   | 139/143 | 214/226 | 183/195 | 294/298 | pos | neg |     |     |     |     |     |      |
|      | KA872  | 09/16/06 | KA868  | M   | 139/143 | ---/226 | 183/195 | 294/298 | pos | neg |     |     |     |     |     |      |
| KA5  | KA869  | 09/02/06 | KA869  | M   | 135/139 | 190/194 | 179/183 | 282/286 | pos | neg |     |     |     |     |     |      |
|      | KA873  | 10/21/06 | KA869  | M   | 135/139 | 190/194 | 179/183 | 282/286 | pos | neg |     |     |     |     |     |      |
| KA6  | KA1417 | 01/22/07 | WL102  | M   | 143/151 | 202/230 | 171/179 | 290/302 | pos | neg |     |     |     |     |     |      |
|      | KA1418 | 01/22/07 | WL102  | M   | 143/151 | 202/230 | 171/179 | 290/302 | pos | neg |     |     |     |     |     |      |
|      | KA1424 | 01/29/07 | WL102  | M   | 143/151 | 202/230 | 171/179 | 290/302 | pos | neg |     |     |     |     |     |      |
|      | KA1426 | 02/02/07 | WL102  | M   | 143/151 | ---/230 | 171/179 | 290/302 | pos | neg |     |     |     |     |     |      |
| KA7  | KA1419 | 01/22/07 | WL102  | n/a | 143/147 | 202/230 | 155/171 | 290/306 | pos | pos |     | 892 | 232 |     | 440 | 1419 |
|      | KA1420 | 01/26/07 | WL102  | n/a | 143/147 | 202/230 | 155/171 | 290/306 | pos | neg |     |     |     |     |     |      |
|      | KA1421 | 01/26/07 | WL102  | n/a | 143/147 | 202/230 | 155/171 | 290/306 | pos | neg |     |     |     |     |     |      |
|      | KA1422 | 01/28/07 | WL102  | n/a | 143/147 | 202/230 | 155/171 | 290/306 | pos | pos |     |     | 232 |     |     |      |
|      | KA1423 | 01/28/07 | WL102  | n/a | 143/147 | 202/230 | 155/171 | 290/306 | pos | pos |     |     | 232 |     |     |      |
|      | KA1425 | 02/02/07 | WL102  | n/a | 143/147 | 202/230 | 155/171 | 290/306 | pos | pos |     |     | 232 |     |     |      |
| KA8  | KA2172 | 09/14/07 | AZ2162 | M   | 135/143 | ---/--- | 175/183 | ---/--- | pos | neg |     |     |     |     |     |      |
|      | KA2218 | 09/07/07 | AZ2162 | M   | 135/143 | ---/--- | 175/183 | 298/302 | pos | neg |     |     |     |     |     |      |
| KA9  | KA2248 | 09/27/07 | AZ2162 | n/a | 135/143 | ---/--- | 167/175 | ---/--- | pos | neg |     |     |     |     |     |      |
| KA10 | KA2221 | 09/11/07 | KA2221 | F   | 143/151 | 230/234 | 179/183 | 290/294 | pos | neg |     |     |     |     |     |      |
| KA11 | KA2257 | 10/03/07 | KA2221 | F   | 139/143 | 226/230 | 179/179 | 302/306 | pos | neg |     |     |     |     |     |      |
| KA12 | KA2230 | 09/19/07 | KA2230 | M   | 147/151 | 190/194 | 167/171 | 298/302 | pos | neg |     |     |     |     |     |      |
| KA13 | KA2243 | 09/26/07 | KA2243 | M   | 143/151 | 202/234 | 183/195 | 298/310 | pos | neg |     |     |     |     |     |      |
|      | KA2255 | 09/30/07 | KA2243 | n/a | 143/151 | 202/234 | 183/195 | 298/310 | pos | neg |     |     |     |     |     |      |
| KO1  | KO2626 | 12/02/08 | KO2626 | F   | 139/151 | 234/234 | 179/191 | 294/302 | pos | neg |     |     |     |     |     |      |
|      | KO2627 | 12/03/08 | KO2626 | F   | 139/151 | 234/234 | 179/191 | 294/302 | pos | neg |     |     |     |     |     |      |
|      | KO2628 | 12/03/08 | KO2626 | F   | 139/151 | 234/234 | 179/191 | 294/302 | pos | neg |     |     |     |     |     |      |
|      | KO2629 | 12/03/08 | KO2626 | F   | 139/151 | 234/234 | 179/191 | 294/302 | pos | neg |     |     |     |     |     |      |
|      | KO2630 | 12/03/08 | KO2626 | F   | 139/151 | 234/234 | 179/191 | 294/302 | pos | neg |     |     |     |     |     |      |
|      | KO2631 | 12/03/08 | KO2626 | F   | 139/151 | 234/234 | 179/191 | 294/302 | pos | neg |     |     |     |     |     |      |
|      | KO2632 | 12/03/08 | KO2626 | F   | 139/151 | 234/234 | 179/191 | 294/302 | pos | neg |     |     |     |     |     |      |
|      | KO2633 | 12/03/08 | KO2626 | F   | 139/151 | 234/234 | 179/191 | 294/302 | pos | neg |     |     |     |     |     |      |
|      | KO2657 | 01/06/09 | KO2626 | F   | 139/151 | 234/234 | 179/191 | 294/302 | pos | neg |     |     |     |     |     |      |
| KS1  | KS310  | 09/07/05 | KS310  | M   | 139/151 | 190/226 | 179/187 | 298/302 | pos | neg |     |     |     |     |     |      |
| KS2  | KS311  | 09/11/05 | KS311  | F   | 135/147 | 190/190 | 179/183 | 294/298 | pos | neg |     |     |     |     |     |      |
|      | KS313  | 11/12/05 | KS311  | n/a | 135/147 | 190/190 | 179/183 | 294/--- | pos | neg |     |     |     |     |     |      |
| KS3  | KS378  | 01/18/06 | KS378  | M   | 139/143 | 190/214 | 175/179 | 290/294 | pos | neg |     |     |     |     |     |      |
| LU1  | LU1705 | 03/31/07 | WL111  | n/a | 139/139 | 190/238 | 175/183 | 298/302 | pos | pos |     |     | 232 |     |     |      |
|      | LU1706 | 04/03/07 | WL111  | n/a | 139/139 | 190/238 | 175/183 | 298/302 | pos | pos |     |     | 232 |     |     |      |
|      | LU1707 | 04/03/07 | WL111  | M   | 139/139 | 190/238 | 175/183 | 298/302 | pos | pos |     |     | 232 |     |     |      |

|     |        |          |        |     |         |         |         |         |     |     |     |     |     |     |      |
|-----|--------|----------|--------|-----|---------|---------|---------|---------|-----|-----|-----|-----|-----|-----|------|
|     | LU1708 | 04/06/07 | WL111  | M   | 139/139 | 190/238 | 175/183 | 298/302 | pos | pos |     |     | 232 | 501 | 417  |
|     | LU1709 | 04/06/07 | WL111  | M   | 139/139 | ---/238 | 175/183 | 298/302 | pos | pos |     |     | 232 |     |      |
|     | LU1710 | 04/10/07 | WL111  | M   | 139/139 | ---/--- | ---/183 | ---/--- | pos | pos |     |     | 232 |     |      |
|     | LU1711 | 04/13/07 | WL111  | M   | 139/139 | 190/238 | 175/183 | 298/302 | pos | pos |     |     | 232 |     |      |
|     | LU1712 | 04/16/07 | WL111  | M   | 139/139 | ---/--- | ---/183 | ---/--- | pos | pos |     |     | 232 |     |      |
|     | LU1713 | 04/17/07 | WL111  | M   | 139/139 | 190/238 | ---/183 | 298/--- | pos | pos |     |     | 232 |     |      |
|     | LU1714 | 04/17/07 | WL111  | M   | 139/139 | 190/238 | 175/183 | 298/302 | pos | pos |     |     | 232 |     |      |
|     | LU1715 | 04/23/07 | WL111  | M   | 139/139 | 190/--- | 175/183 | 298/302 | pos | pos |     |     | 232 |     |      |
|     | LU1716 | 04/26/07 | WL111  | n/a | 139/139 | ---/--- | 175/--- | 298/302 | pos | pos |     |     | 232 |     |      |
|     | LU1717 | 04/29/07 | WL111  | M   | 139/139 | ---/238 | 175/183 | 298/302 | pos | pos |     |     | 232 |     |      |
|     | LU1718 | 04/29/07 | WL111  | M   | 139/139 | ---/--- | 175/183 | ---/302 | pos | neg |     |     |     |     |      |
|     | LU1719 | 05/03/07 | WL111  | M   | 139/139 | 190/--- | ---/183 | 298/--- | pos | pos |     |     | 232 |     |      |
| LU2 | LU2020 | 06/22/07 | LU2020 | F   | 139/151 | 230/238 | 179/183 | 286/302 | pos | pos |     | 892 | 232 | 520 |      |
|     | LU2021 | 06/22/07 | LU2020 | F   | 139/151 | 230/238 | 179/183 | 286/302 | pos | pos | 545 | 892 | 232 | 520 |      |
|     | LU2022 | 06/22/07 | LU2020 | F   | 139/151 | 230/238 | 179/183 | 286/302 | pos | pos |     |     | 232 |     |      |
|     | LU2023 | 06/25/07 | LU2020 | F   | 139/151 | 230/238 | 179/183 | 286/302 | pos | pos |     |     | 232 |     |      |
|     | LU2024 | 06/25/07 | LU2020 | F   | 139/151 | 230/238 | 179/183 | 286/302 | pos | pos | 545 | 892 | 232 |     |      |
|     | LU2025 | 06/25/07 | LU2020 | F   | 139/151 | 230/238 | 179/183 | 286/302 | pos | pos |     |     | 232 |     |      |
|     | LU2026 | 06/25/07 | LU2020 | F   | 139/151 | 230/238 | 179/183 | 286/302 | pos | pos |     |     | 232 |     |      |
|     | LU2027 | 06/30/07 | LU2020 | F   | 139/151 | 230/238 | 179/183 | 286/302 | pos | pos |     |     | 232 | 444 |      |
|     | LU2028 | 06/30/07 | LU2020 | F   | 139/151 | 230/238 | 179/183 | 286/302 | pos | pos |     |     | 232 |     |      |
|     | LU2029 | 06/30/07 | LU2020 | F   | 139/151 | 230/238 | 179/183 | 286/302 | pos | pos | 545 |     | 232 | 520 | 444  |
|     | LU2030 | 06/30/07 | LU2020 | F   | 139/151 | 230/238 | 179/183 | 286/302 | pos | neg |     |     |     |     | 1243 |
|     | LU2031 | 06/30/07 | LU2020 | F   | 139/151 | 230/238 | 179/183 | 286/302 | pos | pos |     |     | 232 |     |      |
|     | LU2032 | 07/04/07 | LU2020 | F   | 139/151 | 230/238 | 179/183 | 286/302 | pos | pos | 545 | 892 | 232 | 444 |      |
|     | LU2033 | 07/04/07 | LU2020 | F   | 139/151 | 230/238 | 179/183 | 286/302 | pos | neg |     |     |     |     |      |
|     | LU2034 | 07/04/07 | LU2020 | F   | 139/151 | 230/238 | 179/183 | 286/302 | pos | pos |     |     | 232 |     |      |
|     | LU2035 | 07/04/07 | LU2020 | F   | 139/151 | 230/238 | 179/183 | 286/302 | pos | neg |     |     |     |     |      |
|     | LU2036 | 07/04/07 | LU2020 | F   | 139/151 | 230/238 | 179/183 | 286/302 | pos | pos |     |     | 232 |     |      |
| LU3 | LU2473 | 04/18/08 | LU2473 | M   | 147/155 | 230/238 | ---/--- | 298/302 | pos | neg |     |     |     |     |      |
|     | LU2482 | 04/29/08 | LU2473 | n/a | ---/155 | ---/--- | 179/187 | 298/302 | pos | neg |     |     |     |     |      |
| MO1 | MO2118 | 08/05/07 | EP486  | M   | 143/151 | 190/198 | 183/187 | 290/294 | pos | pos | 540 |     | 232 | 512 | 431  |
|     | MO2120 | 08/09/07 | EP486  | M   | 143/151 | 190/198 | 183/187 | 290/294 | pos | pos |     |     | 232 |     |      |
| MU1 | MU406  | 11/27/05 | MU406  | M   | 151/155 | 202/226 | 151/155 | 290/298 | pos | pos |     |     | 232 | 444 |      |
| MU2 | MU407  | 11/27/05 | MU407  | M   | 139/155 | 190/202 | 155/187 | 294/298 | pos | neg |     |     |     |     |      |
| MU3 | MU409  | 12/27/05 | MU409  | M   | 139/151 | 194/234 | 155/187 | 302/306 | pos | pos |     |     | 232 | 435 | 778  |
| MU4 | MU716  | 03/19/06 | MU716  | M   | 139/155 | 226/230 | 155/183 | 294/298 | pos | neg |     |     |     |     |      |
|     | MU717  | 03/19/06 | MU716  | M   | 139/155 | ---/--- | 155/183 | 294/298 | pos | neg |     |     |     |     |      |
|     | MU718  | 03/19/06 | MU716  | M   | 139/155 | 226/230 | 155/183 | 294/298 | pos | neg |     |     |     |     |      |
| MU5 | MU1067 | 10/27/06 | MU1067 | F   | 139/151 | 190/234 | 183/187 | 302/306 | pos | neg |     |     |     |     |      |
|     | MU1068 | 10/27/06 | MU1067 | F   | 139/151 | 190/234 | 183/187 | 302/306 | pos | neg |     |     |     |     |      |
|     | MU1069 | 10/27/06 | MU1067 | F   | 139/151 | 190/234 | 183/187 | 302/306 | pos | neg |     |     |     |     |      |
|     | MU1070 | 10/27/06 | MU1067 | F   | 139/151 | 190/234 | 183/187 | 302/306 | pos | neg |     |     |     |     |      |
|     | MU1071 | 10/27/06 | MU1067 | F   | 139/151 | 190/234 | 183/187 | 302/306 | pos | neg |     |     |     |     |      |
|     | MU1073 | 11/02/06 | MU1067 | F   | 139/151 | 190/234 | 183/187 | 302/306 | pos | neg |     |     |     |     |      |
|     | MU1074 | 11/02/06 | MU1067 | F   | 139/151 | 190/234 | 183/187 | 302/306 | pos | neg |     |     |     |     |      |
|     | MU1075 | 11/02/06 | MU1067 | F   | 139/151 | 190/234 | 183/187 | 302/306 | pos | neg |     |     |     |     |      |
|     | MU1076 | 11/02/06 | MU1067 | F   | 139/151 | 190/234 | 183/187 | 302/306 | pos | neg |     |     |     |     |      |
|     | MU1082 | 11/10/06 | MU1067 | F   | 139/151 | 190/234 | 183/187 | 302/306 | pos | neg |     |     |     |     |      |
|     | MU1083 | 11/10/06 | MU1067 | F   | 139/151 | 190/234 | 183/187 | 302/306 | pos | neg |     |     |     |     |      |
|     | MU1084 | 11/10/06 | MU1067 | F   | 139/151 | 190/234 | 183/187 | 302/306 | pos | pos |     |     |     | 435 |      |
|     | MU1085 | 11/10/06 | MU1067 | F   | 139/151 | 190/234 | 183/187 | 302/306 | pos | neg |     |     |     |     |      |
| MU6 | MU1072 | 11/02/06 | MU1067 | M   | 135/155 | 202/230 | 155/179 | 298/302 | pos | neg |     |     |     |     |      |
|     | MU1077 | 11/02/06 | MU1067 | M   | 135/155 | 202/230 | 155/179 | 298/302 | pos | neg |     |     |     |     |      |
|     | MU1078 | 11/02/06 | MU1067 | M   | 135/155 | 202/230 | 155/179 | 298/302 | pos | neg |     |     |     |     |      |
|     | MU1079 | 11/02/06 | MU1067 | M   | 135/155 | 202/230 | 155/179 | 298/302 | pos | neg |     |     |     |     |      |
|     | MU1080 | 11/02/06 | MU1067 | M   | 135/155 | 202/230 | 155/179 | 298/302 | pos | neg |     |     |     |     |      |
|     | MU1081 | 11/10/06 | MU1067 | M   | 135/155 | 202/230 | 155/179 | 298/302 | pos | neg |     |     |     |     |      |
|     | MU1086 | 11/10/06 | MU1067 | M   | 135/155 | 202/230 | 155/179 | 298/302 | pos | neg |     |     |     |     |      |
| OP1 | OP2152 | 08/20/07 | OP2152 | M   | 135/155 | 198/230 | 167/175 | 290/294 | pos | neg |     |     |     |     |      |
| OP2 | OP3369 | 04/20/11 | WL109  | F   | ---/155 | 190/--- | ---/175 | 286/--- | pos | pos | 570 |     | 232 | 481 | 411  |
|     | OP3370 | 04/20/11 | WL109  | F   | 151/155 | ---/--- | 171/175 | ---/290 | pos | pos |     |     | 232 | 481 | 411  |
|     | OP3371 | 04/20/11 | WL109  | F   | 151/155 | 190/230 | 171/175 | 286/--- | pos | pos | 570 | 892 | 232 | 481 | 411  |
|     | OP3372 | 04/20/11 | WL109  | n/a | 151/--- | 190/--- | 171/--- | ---/290 | pos | pos | 570 | 892 | 232 | 481 | 411  |
|     | OP3373 | 04/25/11 | WL109  | F   | 151/155 | ---/230 | 171/--- | 286/--- | pos | pos | 570 | 892 | 232 | 481 |      |
|     | OP3374 | 04/25/11 | WL109  | F   | 151/--- | 190/230 | 171/175 | 286/290 | pos | pos |     |     | 232 | 411 |      |
|     | OP3375 | 04/25/11 | WL109  | F   | 151/155 | 190/230 | 171/175 | 286/290 | pos | pos | 570 |     | 232 | 481 | 411  |
|     | OP3376 | 04/25/11 | WL109  | F   | 151/155 | 190/230 | 171/175 | 286/290 | pos | pos | 570 |     | 232 | 481 | 843  |

|                          |        |          |        |     |         |         |         |         |     |     |                  |     |     |     |     |                  |
|--------------------------|--------|----------|--------|-----|---------|---------|---------|---------|-----|-----|------------------|-----|-----|-----|-----|------------------|
|                          | OP3377 | 04/28/11 | WL109  | F   | 151/155 | ---/230 | 171/175 | 286/290 | pos | pos | 570              |     | 232 |     | 411 | 843              |
|                          | OP3378 | 04/28/11 | WL109  | F   | 151/155 | 190/230 | 171/175 | 286/290 | pos | pos | 570              |     | 232 | 481 | 411 | 843              |
|                          | OP3379 | 04/28/11 | WL109  | n/a | 151/155 | ---/--- | 171/--- | ---/290 | pos | pos | 570              |     | 232 | 481 | 411 |                  |
|                          | OP3380 | 04/28/11 | WL109  | n/a | 151/--- | ---/--- | 171/--- | ---/290 | pos | pos |                  | 892 | 232 |     | 411 |                  |
|                          | OP3381 | 04/28/11 | WL109  | F   | 151/155 | ---/--- | 171/--- | ---/--- | pos | pos |                  |     | 232 |     |     |                  |
|                          | OP3382 | 05/01/11 | WL109  | F   | 151/155 | 190/--- | 171/175 | ---/--- | pos | neg |                  |     |     |     |     |                  |
|                          | OP3383 | 05/01/11 | WL109  | n/a | 151/155 | ---/--- | 171/175 | ---/--- | pos | neg |                  |     |     |     |     |                  |
|                          | OP3384 | 05/01/11 | WL109  | F   | 151/155 | 190/230 | ---/175 | ---/290 | pos | neg |                  |     |     |     |     |                  |
|                          | OP3385 | 05/01/11 | WL109  | F   | 151/155 | 190/230 | 171/175 | ---/290 | pos | pos | 570              | 892 | 232 | 481 | 411 | 843              |
|                          | OP3386 | 05/01/11 | WL109  | F   | 151/155 | 190/230 | 171/175 | 286/290 | pos | pos | 570              |     | 232 | 481 | 411 |                  |
|                          | OP3387 | 05/01/11 | WL109  | n/a | 151/--- | 190/230 | 171/175 | 286/290 | pos | neg |                  |     |     |     |     |                  |
|                          | OP3388 | 05/04/11 | WL109  | F   | 151/155 | 190/230 | 171/175 | 286/290 | pos | pos | 570              |     | 232 | 481 | 411 |                  |
|                          | OP3389 | 05/04/11 | WL109  | F   | 151/155 | 190/--- | 171/175 | ---/290 | pos | neg |                  |     |     |     |     |                  |
|                          | OP3390 | 05/04/11 | WL109  | F   | 151/155 | 190/--- | 171/175 | 286/290 | pos | pos | 570              |     | 232 | 481 | 411 | 843              |
|                          | OP3391 | 05/04/11 | WL109  | n/a | 151/155 | ---/230 | 171/175 | ---/--- | pos | neg |                  |     |     |     |     |                  |
|                          | OP3392 | 05/04/11 | WL109  | n/a | 151/155 | 190/230 | 171/175 | ---/--- | pos | neg |                  |     |     |     |     |                  |
|                          | OP3393 | 05/04/11 | WL109  | F   | 151/155 | 190/230 | 171/175 | 286/--- | pos | pos | 570              | 892 | 232 | 481 | 411 | 843              |
| PA1 (DRC-1) <sup>7</sup> | PA76   | 05/27/03 | KS10   | M   | 139/151 | 190/194 | 155/183 | 294/298 | pos | pos | 542 <sup>7</sup> | 892 |     | 499 |     | 699 <sup>7</sup> |
| PA2                      | PA75   | 05/27/03 | KS9    | M   | 139/147 | 190/194 | 183/187 | 286/294 | pos | pos |                  | 892 |     |     | 328 |                  |
| PA3                      | PA338  | 07/12/05 | PA338  | M   | 135/151 | 194/230 | 179/183 | 290/294 | pos | neg |                  |     |     |     |     |                  |
|                          | PA339  | 07/12/05 | PA338  | M   | 135/151 | 194/230 | 179/183 | 290/294 | pos | pos |                  |     | 232 |     |     |                  |
| PA4                      | PA366  | 12/15/05 | PA366  | M   | 147/151 | 194/230 | 155/179 | 294/298 | pos | neg |                  |     |     |     |     |                  |
|                          | PA367  | 12/15/05 | PA366  | M   | 147/151 | 194/230 | 155/179 | 294/298 | pos | neg |                  |     |     |     |     |                  |
|                          | PA368  | 12/15/05 | PA366  | M   | 147/151 | 194/230 | 155/179 | 294/298 | pos | neg |                  |     |     |     |     |                  |
| PA5                      | PA460  | 02/03/06 | PA460  | M   | 139/143 | 230/234 | 179/183 | 298/302 | pos | neg |                  |     |     |     |     |                  |
|                          | PA463  | 02/07/06 | PA460  | M   | 139/143 | 230/234 | 179/183 | 298/302 | pos | neg |                  |     |     |     |     |                  |
|                          | PA464  | 02/08/06 | PA460  | M   | 139/143 | 230/234 | 179/183 | 298/302 | pos | neg |                  |     |     |     |     |                  |
| PA6                      | PA584  | 03/17/06 | PA584  | F   | 135/139 | 226/238 | 155/187 | 294/298 | pos | neg |                  |     |     |     |     |                  |
|                          | PA585  | 03/17/06 | PA584  | F   | 135/139 | 226/238 | 155/187 | 294/298 | pos | neg |                  |     |     |     |     |                  |
|                          | PA593  | 03/18/06 | PA584  | F   | 135/139 | 226/238 | 155/187 | 294/298 | pos | neg |                  |     |     |     |     |                  |
|                          | PA594  | 03/18/06 | PA584  | F   | 135/139 | 226/238 | 155/187 | 294/298 | pos | neg |                  |     |     |     |     |                  |
| PA7                      | PA1044 | 09/12/06 | PA1044 | n/a | 139/151 | 202/230 | 179/187 | 302/306 | pos | neg |                  |     |     |     |     |                  |
|                          | PA1046 | 09/15/06 | PA1044 | F   | 139/151 | 202/230 | 179/187 | 302/306 | pos | neg |                  |     |     |     |     |                  |
|                          | PA1047 | 09/15/06 | PA1044 | F   | 139/151 | 202/230 | 179/187 | 302/306 | pos | neg |                  |     |     |     |     |                  |
| PA8                      | PA1048 | 09/15/06 | PA1044 | n/a | 139/151 | 202/230 | 179/187 | 294/306 | pos | neg |                  |     |     |     |     |                  |
|                          | PA1049 | 09/15/06 | PA1044 | F   | 139/151 | 202/230 | 179/187 | 294/--- | pos | pos |                  |     | 232 |     |     |                  |
|                          | PA1052 | 09/15/06 | PA1044 | n/a | 139/151 | 202/230 | 179/187 | 294/306 | pos | neg |                  |     |     |     |     |                  |
|                          | PA1053 | 09/15/06 | PA1044 | F   | 139/151 | 202/230 | 179/187 | 294/306 | pos | neg |                  |     |     |     |     |                  |
|                          | PA1054 | 09/15/06 | PA1044 | F   | 139/151 | 202/230 | 179/187 | 294/306 | pos | neg |                  |     |     |     |     |                  |
|                          | PA1055 | 09/15/06 | PA1044 | F   | 139/151 | 202/230 | 179/187 | ---/306 | pos | neg |                  |     |     |     |     |                  |
|                          | PA1056 | 09/15/06 | PA1044 | F   | 139/151 | 202/--- | 179/187 | 294/306 | pos | neg |                  |     |     |     |     |                  |
|                          | PA1057 | 09/15/06 | PA1044 | F   | 139/151 | 202/230 | 179/187 | 294/306 | pos | neg |                  |     |     |     |     |                  |
| PA9                      | PA1065 | 12/06/06 | PA1065 | F   | 143/155 | 176/184 | 179/187 | 298/306 | pos | neg |                  |     |     |     |     |                  |
| PA10                     | PA1573 | 03/09/07 | PA1573 | F   | 147/151 | 230/230 | 187/187 | 298/302 | pos | pos |                  |     | 232 |     |     |                  |
|                          | PA1578 | 03/09/07 | PA1573 | F   | 147/151 | 230/230 | 187/187 | 298/302 | pos | neg |                  |     |     |     |     |                  |
|                          | PA1584 | 03/09/07 | PA1573 | n/a | 147/151 | 230/230 | 187/187 | 298/302 | pos | neg |                  |     |     |     |     |                  |
|                          | PA1585 | 03/09/07 | PA1573 | n/a | 147/151 | 230/230 | 187/187 | 298/302 | pos | neg |                  |     |     |     |     |                  |
|                          | PA1586 | 03/09/07 | PA1573 | n/a | 147/151 | 230/230 | 187/187 | 298/302 | pos | neg |                  |     |     |     |     |                  |
|                          | PA1587 | 03/16/07 | PA1573 | F   | 147/151 | 230/230 | 187/187 | 298/302 | pos | neg |                  |     |     |     |     |                  |
|                          | PA1588 | 03/16/07 | PA1573 | F   | 147/151 | 230/230 | 187/187 | 298/302 | pos | neg |                  |     |     |     |     |                  |
|                          | PA1589 | 03/16/07 | PA1573 | F   | 147/151 | 230/230 | 187/187 | 298/302 | pos | neg |                  |     |     |     |     |                  |
|                          | PA1592 | 03/16/07 | PA1573 | F   | 147/151 | 230/230 | 187/187 | 298/302 | pos | neg |                  |     |     |     |     |                  |
|                          | PA1594 | 03/16/07 | PA1573 | F   | 147/151 | 230/230 | 187/187 | 298/302 | pos | neg |                  |     |     |     |     |                  |
|                          | PA1596 | 03/16/07 | PA1573 | n/a | 147/151 | 230/230 | 187/187 | 298/302 | pos | neg |                  |     |     |     |     |                  |
| PA11                     | PA1591 | 03/16/07 | PA1591 | F   | 143/147 | 230/230 | 183/195 | 294/298 | pos | neg |                  |     |     |     |     |                  |
| PA12                     | PA3138 | 12/12/10 | PA3138 | M   | 135/139 | 214/230 | 179/187 | 298/302 | pos | neg |                  |     |     |     |     |                  |
|                          | PA3139 | 12/12/10 | PA3138 | M   | 135/139 | 214/230 | 179/187 | 298/302 | pos | neg |                  |     |     |     |     |                  |
|                          | PA3140 | 12/12/10 | PA3138 | M   | 135/139 | 214/230 | 179/187 | 298/302 | pos | neg |                  |     |     |     |     |                  |
|                          | PA3141 | 12/12/10 | PA3138 | M   | 135/139 | 214/230 | 179/187 | 298/302 | pos | neg |                  |     |     |     |     |                  |
|                          | PA3142 | 12/12/10 | PA3138 | M   | 135/139 | 214/230 | 179/187 | 298/302 | pos | neg |                  |     |     |     |     |                  |
|                          | PA3143 | 12/12/10 | PA3138 | M   | 135/139 | 214/230 | 179/187 | 298/302 | pos | neg |                  |     |     |     |     |                  |
|                          | PA3144 | 12/13/10 | PA3138 | M   | 135/139 | 214/230 | 179/187 | 298/302 | pos | neg |                  |     |     |     |     |                  |
|                          | PA3145 | 12/13/10 | PA3138 | M   | 135/139 | 214/230 | 179/187 | 298/302 | pos | neg |                  |     |     |     |     |                  |
|                          | PA3146 | 12/13/10 | PA3138 | M   | 135/139 | 214/230 | 179/187 | 298/302 | pos | neg |                  |     |     |     |     |                  |
|                          | PA3147 | 12/13/10 | PA3138 | M   | 135/139 | 214/230 | 179/187 | 298/302 | pos | neg |                  |     |     |     |     |                  |
| UB1                      | UB437  | 01/05/06 | UB437  | M   | 139/151 | 186/190 | 179/183 | 302/306 | pos | neg |                  |     |     |     |     |                  |
| UB2                      | UB445  | 01/18/06 | UB445  | M   | 139/155 | 190/202 | 179/183 | 290/302 | pos | neg |                  |     |     |     |     |                  |

|       |          |          |       |         |         |         |         |         |     |     |             |
|-------|----------|----------|-------|---------|---------|---------|---------|---------|-----|-----|-------------|
| UB3   | UB1456   | 02/22/07 | UB445 | M       | 139/151 | 182/234 | 183/187 | 294/302 | pos | pos | 232         |
|       | UB1457   | 02/22/07 | UB445 | n/a     | 139/151 | 182/234 | 183/187 | 294/302 | pos | neg |             |
| UB4   | UB1458   | 02/22/07 | UB445 | M       | 139/139 | 182/234 | 147/187 | 294/294 | pos | pos | 232         |
| UB5   | UB446    | 01/18/06 | UB446 | M       | 135/139 | 194/202 | 171/183 | 294/302 | pos | neg |             |
| UB6   | UB596    | 02/08/06 | UB596 | M       | 139/151 | 190/194 | 171/179 | 294/298 | pos | neg |             |
|       | UB597    | 02/08/06 | UB596 | n/a     | 139/151 | 190/194 | 171/179 | 294/298 | pos | pos | 549 232 437 |
| UB7   | UB601    | 02/18/06 | UB601 | n/a     | 139/139 | 190/190 | 183/183 | 290/290 | pos | neg |             |
|       | UB602    | 02/18/06 | UB601 | F       | 139/139 | 190/190 | 183/183 | 290/290 | pos | neg |             |
|       | UB603    | 02/18/06 | UB601 | F       | 139/139 | 190/190 | 183/183 | 290/290 | pos | neg |             |
| WA1   | WA344    | 06/13/05 | WA344 | M       | 147/151 | 186/190 | 171/175 | 294/294 | pos | neg |             |
| WA2   | WA466    | 03/03/06 | WA466 | F       | 151/155 | 190/202 | 179/183 | 294/302 | pos | neg |             |
|       | WA467    | 03/03/06 | WA466 | F       | 151/155 | 190/202 | 179/183 | 294/302 | pos | neg |             |
|       | WA468    | 03/03/06 | WA466 | F       | 151/155 | 190/202 | 179/183 | 294/302 | pos | neg |             |
|       | WA469    | 03/04/06 | WA466 | F       | 151/155 | 190/202 | 179/183 | 294/302 | pos | neg |             |
|       | WA470    | 03/04/06 | WA466 | F       | 151/155 | 190/202 | 179/183 | 294/302 | pos | neg |             |
|       | WA471    | 03/04/06 | WA466 | F       | 151/155 | 190/202 | 179/183 | 294/302 | pos | neg |             |
|       | WA472    | 03/04/06 | WA466 | F       | 151/155 | 190/202 | 179/183 | 294/302 | pos | neg |             |
|       | WA473    | 03/04/06 | WA466 | F       | 151/155 | 190/202 | 179/183 | 294/302 | pos | neg |             |
|       | WA474    | 03/04/06 | WA466 | F       | 151/155 | 190/202 | 179/183 | 294/302 | pos | neg |             |
|       | WA475    | 03/04/06 | WA466 | F       | 151/155 | 190/202 | 179/183 | 294/302 | pos | neg |             |
|       | WA476    | 03/04/06 | WA466 | F       | 151/155 | 190/202 | 179/183 | 294/302 | pos | neg |             |
| WA3   | WA519    | 03/19/06 | KS11  | n/a     | 139/143 | 190/--- | 151/167 | 286/--- | pos | neg |             |
|       | WA520    | 03/19/06 | KS11  | n/a     | 139/143 | 190/202 | 151/167 | 286/302 | pos | neg |             |
|       | WA522    | 03/20/06 | KS11  | n/a     | 139/143 | 190/202 | 151/167 | 286/302 | pos | neg |             |
|       | WA523    | 03/20/06 | KS11  | n/a     | 139/143 | 190/202 | 151/167 | 286/302 | pos | neg |             |
|       | WA524    | 03/20/06 | KS11  | n/a     | 139/143 | 190/202 | 151/167 | 286/302 | pos | neg |             |
|       | WA525    | 03/21/06 | KS11  | n/a     | 139/143 | 190/202 | 151/167 | 286/302 | pos | neg |             |
|       | WA526    | 03/21/06 | KS11  | n/a     | 139/143 | 190/202 | 151/167 | 286/302 | pos | neg |             |
|       | WA527    | 03/21/06 | KS11  | n/a     | 139/143 | 190/202 | 151/167 | ---/302 | pos | neg |             |
|       | WA529    | 03/24/06 | KS11  | n/a     | 139/143 | 190/202 | 151/167 | 286/302 | pos | neg |             |
|       | WA530    | 03/24/06 | KS11  | n/a     | 139/143 | 190/202 | 151/167 | 286/302 | pos | neg |             |
| WA531 | 03/24/06 | KS11     | n/a   | 139/143 | 190/202 | 151/167 | ---/302 | pos     | neg |     |             |
| WA4   | WA547    | 03/28/06 | KS11  | F       | 135/143 | 186/194 | 175/179 | 290/294 | pos | neg |             |
|       | WA551    | 03/29/06 | KS11  | F       | 135/143 | 186/194 | 175/179 | 290/294 | pos | neg |             |
|       | WA552    | 03/29/06 | KS11  | F       | 135/143 | 186/194 | 175/179 | 290/294 | pos | neg |             |
|       | WA553    | 03/29/06 | KS11  | F       | 135/143 | 186/194 | 175/179 | 290/294 | pos | neg |             |
| WA5   | WA533    | 02/14/06 | WL105 | F       | 139/151 | 190/--- | 183/187 | 290/294 | pos | neg |             |
|       | WA534    | 02/14/06 | WL105 | F       | 139/151 | 190/230 | 183/187 | ---/--- | pos | neg |             |
|       | WA535    | 02/14/06 | WL105 | n/a     | 139/151 | 190/230 | 183/--- | 290/--- | pos | neg |             |
|       | WA536    | 02/14/06 | WL105 | n/a     | 139/151 | 190/230 | 183/187 | 290/--- | pos | neg |             |
|       | WA537    | 02/14/06 | WL105 | n/a     | 139/151 | 190/230 | 183/187 | 290/294 | pos | neg |             |
|       | WA538    | 02/14/06 | WL105 | F       | 139/151 | 190/230 | 183/187 | 290/--- | pos | neg |             |
| WA6   | WA539    | 03/28/06 | WA543 | M       | 155/159 | 190/202 | 155/187 | 298/302 | pos | neg |             |
|       | WA541    | 03/28/06 | WA543 | M       | 155/159 | 190/202 | 155/187 | 298/302 | pos | neg |             |
|       | WA542    | 03/28/06 | WA543 | M       | 155/159 | 190/202 | 155/187 | 298/302 | pos | pos | 434         |
|       | WA543    | 03/28/06 | WA543 | M       | 155/159 | 190/202 | 155/187 | 298/302 | pos | neg |             |
| WA550 | 03/29/06 | WA543    | M     | 155/159 | 190/202 | 155/187 | 298/302 | pos     | neg |     |             |
| WA7   | WA540    | 03/28/06 | WA543 | n/a     | 135/139 | 190/194 | 179/183 | 282/286 | pos | neg |             |
| WA8   | WA549    | 03/29/06 | WA549 | F       | 135/139 | 198/202 | 187/191 | 286/318 | pos | neg |             |
| WB1   | WB710    | 06/01/06 | BD2   | F       | 135/139 | 226/234 | 175/179 | 286/298 | pos | neg |             |
|       | WB712    | 06/01/06 | BD2   | F       | 135/139 | 226/234 | 175/179 | 286/298 | pos | neg |             |
|       | WB714    | 06/03/06 | BD2   | F       | 135/139 | ---/234 | ---/179 | 286/298 | pos | neg |             |
| WB2   | WB713    | 06/03/06 | WB713 | M       | 135/139 | 230/234 | 175/179 | 290/298 | pos | neg |             |
|       | WB2321   | 10/06/07 | WB713 | n/a     | 135/139 | 230/234 | 175/179 | 290/298 | pos | pos | 232         |
|       | WB2328   | 11/30/07 | WB713 | n/a     | 135/139 | 230/--- | ---/179 | ---/--- | pos | neg |             |
| WB3   | WB2325   | 11/25/07 | WB713 | n/a     | 135/139 | 230/234 | 147/179 | ---/--- | pos | neg |             |
|       | WB2332   | 12/02/07 | WB713 | F       | 135/139 | ---/234 | 147/--- | 298/302 | pos | neg |             |
| WL1   | WL98     | 02/26/04 | WL98  | F       | 139/151 | 214/230 | 155/171 | 294/298 | pos | neg |             |

<sup>1</sup>Chimpanzees are numbered according to their field site of origin (as shown in Figure 1).

<sup>2</sup>F, female; M, male; n/a, data not available.

<sup>3</sup>Microsatellite loci are indicated. Loci or alleles that failed to amplify are indicated with dashed lines.

<sup>4</sup>WB, Western blot; pos, positive.

<sup>5</sup>Amplification of viral sequences by RT-PCR; pos, positive; neg, negative.

<sup>6</sup>FL, full-length viral genome.

<sup>7</sup>These sequences have previously been published (85).

**Table S4. Enumeration of sampled bonobos at three field sites using microsatellite analyses**

| Bonobo <sup>1</sup> | Fecal sample | Collection date<br>mm/dd/yy | mtDNA haplotype | Microsatellite loci <sup>2</sup> |         |         |         |         |         |         |         | Fecal WB <sup>3</sup> |     |
|---------------------|--------------|-----------------------------|-----------------|----------------------------------|---------|---------|---------|---------|---------|---------|---------|-----------------------|-----|
|                     |              |                             |                 | D18s536                          | D4s243  | D10s676 | D9s922  | D2s1326 | D2s1333 | D4s1627 | D9s905  |                       |     |
| IK1                 | IK2889       | 05/14/10                    | IK2876          | 138/150                          | 162/214 | 166/178 | ---/294 | ---/--- | ---/--- | ---/206 | ---/--- | neg                   |     |
|                     | IK2928       | 05/18/10                    | IK2876          | 138/150                          | ---/--- | 166/--- | 290/294 | 254/254 | ---/--- | 194/206 | 273/273 | neg                   |     |
| IK2                 | IK2927       | 05/18/10                    | IK2876          | 138/150                          | 194/194 | 166/166 | 302/302 | 246/254 | ---/--- | 206/206 | 285/285 | neg                   |     |
|                     | IK2876       | 05/13/10                    | IK2876          | 146/150                          | ---/--- | 170/178 | 282/290 | ---/--- | ---/--- | ---/--- | 273/--- | neg                   |     |
| IK3                 | IK2877       | 05/13/10                    | IK2876          | 146/150                          | ---/--- | 170/178 | 282/290 | 246/262 | 293/293 | 190/210 | 273/285 | neg                   |     |
|                     | IK2882       | 05/14/10                    | IK2876          | 146/150                          | ---/--- | 170/178 | 282/--- | 246/262 | ---/--- | ---/--- | 273/285 | neg                   |     |
|                     | IK2883       | 05/14/10                    | IK2876          | 146/150                          | ---/--- | ---/178 | 282/290 | ---/--- | ---/--- | ---/--- | 273/--- | neg                   |     |
|                     | IK2880       | 05/13/10                    | IK2876          | 146/150                          | ---/--- | 166/170 | ---/--- | ---/--- | ---/--- | 190/202 | 273/281 | neg                   |     |
| IK4                 | IK2898       | 05/16/10                    | IK2876          | 146/150                          | ---/--- | 166/170 | 290/--- | 246/--- | 293/293 | 190/202 | 273/--- | neg                   |     |
|                     | IK2902       | 05/17/10                    | IK2876          | 146/150                          | ---/--- | 166/170 | 290/318 | ---/--- | ---/--- | 190/202 | 273/281 | neg                   |     |
|                     | IK2903       | 05/17/10                    | IK2876          | 146/150                          | ---/--- | 166/170 | 290/318 | 246/262 | 293/293 | 190/202 | 273/281 | neg                   |     |
|                     | IK2912       | 05/17/10                    | IK2876          | 146/---                          | ---/--- | 166/170 | 290/--- | ---/--- | ---/--- | ---/--- | 273/281 | neg                   |     |
|                     | IK2913       | 05/17/10                    | IK2876          | 146/150                          | ---/--- | 166/170 | 290/290 | ---/--- | ---/--- | 190/202 | 273/281 | neg                   |     |
|                     | IK2919       | 05/18/10                    | IK2876          | 146/150                          | ---/--- | 166/170 | ---/--- | ---/--- | ---/--- | 190/202 | 273/281 | neg                   |     |
|                     | IK5          | IK2894                      | 05/16/10        | IK2876                           | 146/150 | ---/--- | 166/170 | 290/294 | 242/242 | ---/--- | 202/210 | 273/285               | neg |
| IK2914              |              | 05/17/10                    | IK2876          | 146/150                          | ---/--- | 166/170 | 290/--- | 242/242 | ---/--- | 202/210 | 273/--- | neg                   |     |
| IK2915              |              | 05/18/10                    | IK2876          | 146/150                          | ---/--- | 166/170 | 290/294 | 242/242 | ---/--- | 202/210 | 273/285 | neg                   |     |
| IK6                 | IK2879       | 05/13/10                    | IK2879          | 138/138                          | ---/202 | 170/182 | 286/--- | 250/254 | 293/293 | 190/214 | 281/--- | neg                   |     |
|                     | IK2890       | 05/14/10                    | IK2879          | 138/138                          | ---/--- | 170/182 | 286/290 | 250/254 | 293/293 | 190/--- | 281/285 | neg                   |     |
|                     | IK2916       | 05/18/10                    | IK2879          | 138/138                          | 178/--- | 170/182 | 286/290 | ---/--- | ---/--- | ---/--- | 281/285 | neg                   |     |
| IK7                 | IK2885       | 05/14/10                    | IK2885          | 138/138                          | 206/206 | ---/--- | 294/294 | 242/242 | ---/--- | 194/202 | ---/--- | neg                   |     |
| IK8                 | IK2918       | 05/18/10                    | IK2885          | 138/150                          | ---/--- | 166/178 | 290/306 | ---/--- | ---/--- | 190/190 | 285/285 | neg                   |     |
| IK9                 | IK2887       | 05/14/10                    | IK2885          | 150/150                          | ---/--- | 166/170 | 290/294 | ---/--- | ---/--- | 190/194 | 273/285 | neg                   |     |
|                     | IK2896       | 05/16/10                    | IK2885          | 150/150                          | ---/--- | 166/--- | 290/--- | 216/254 | 293/293 | 190/--- | 273/285 | neg                   |     |
|                     | IK2907       | 05/17/10                    | IK2885          | 150/150                          | ---/--- | 166/170 | 290/294 | ---/254 | ---/--- | 190/194 | 273/285 | neg                   |     |
|                     | IK2923       | 05/18/10                    | IK2885          | 150/150                          | ---/--- | 166/--- | 290/294 | ---/254 | ---/--- | 190/194 | 273/285 | neg                   |     |
| IK10                | IK2926       | 05/18/10                    | KR3             | 138/154                          | ---/--- | 166/178 | 290/294 | 242/242 | 293/293 | 194/194 | 281/281 | neg                   |     |
| IK11                | IK2925       | 05/18/10                    | KR3             | 150/154                          | ---/--- | 178/182 | 290/298 | 242/242 | ---/--- | 190/194 | 281/281 | neg                   |     |
| IK12                | IK2911       | 05/17/10                    | KR5             | 138/138                          | ---/--- | 166/170 | 298/298 | 242/250 | ---/--- | ---/--- | ---/--- | neg                   |     |
| IK13                | IK2905       | 05/17/10                    | KR5             | 138/150                          | 198/198 | 170/170 | 294/298 | 242/246 | 293/293 | 194/194 | 281/281 | neg                   |     |
|                     | IK2908       | 05/17/10                    | KR5             | 138/150                          | ---/--- | 170/170 | 294/298 | ---/--- | ---/--- | 194/194 | 281/281 | neg                   |     |
|                     | IK2910       | 05/17/10                    | KR5             | 138/150                          | ---/--- | 170/170 | 294/298 | 242/246 | ---/--- | 194/194 | 281/281 | neg                   |     |
| IK14                | IK2878       | 05/13/10                    | KR5             | ---/150                          | 214/214 | ---/--- | ---/--- | ---/--- | ---/--- | ---/--- | ---/285 | neg                   |     |
|                     | IK2895       | 05/16/10                    | KR5             | 146/150                          | ---/--- | 166/170 | 290/294 | 242/242 | ---/--- | 190/190 | 281/285 | neg                   |     |
| IK15                | IK2899       | 05/16/10                    | KR6             | 150/150                          | ---/--- | 178/182 | 286/294 | 242/246 | 293/293 | 190/190 | 273/281 | neg                   |     |
|                     | IK2901       | 05/17/10                    | KR6             | 150/150                          | ---/--- | 178/182 | 286/294 | 242/246 | ---/--- | 190/190 | ---/--- | neg                   |     |
| IK16                | IK2891       | 05/16/10                    | KR10            | 138/138                          | ---/--- | 166/170 | 294/302 | 254/258 | ---/--- | 190/190 | 273/--- | neg                   |     |
|                     | IK2920       | 05/18/10                    | KR10            | 138/138                          | ---/--- | 166/170 | 294/--- | 254/258 | 293/293 | 190/190 | 273/285 | neg                   |     |
| IK17                | IK2906       | 05/17/10                    | KR10            | 138/150                          | ---/--- | 170/170 | 302/302 | ---/--- | ---/--- | 190/202 | 273/281 | neg                   |     |
| KR1                 | KR21         | 11/07/06                    | IK2876          | 146/150                          | 190/190 | 170/170 | 294/294 | 238/254 | 293/293 | 194/210 | 281/--- | neg                   |     |
|                     | KR38         | 12/07/06                    | IK2876          | 146/150                          | 190/190 | 170/170 | 294/294 | 238/254 | 293/293 | ---/210 | 281/289 | neg                   |     |
| KR2                 | KR33         | 12/06/06                    | IK2876          | 146/150                          | 190/198 | 170/170 | 290/294 | 238/254 | 293/293 | 194/210 | 281/289 | neg                   |     |
|                     | KR50         | 12/16/06                    | IK2876          | 146/150                          | 190/198 | 170/170 | 290/294 | 238/254 | 293/293 | 194/210 | 281/289 | neg                   |     |
|                     | KR51         | 12/18/06                    | IK2876          | 146/150                          | ---/--- | 170/170 | ---/--- | 238/254 | ---/--- | 194/210 | ---/289 | neg                   |     |
| KR3                 | KR76         | n/a                         | IK2876          | 154/154                          | ---/--- | 166/178 | ---/--- | ---/--- | 210/214 | 281/281 | neg     |                       |     |
| KR4                 | KR77         | n/a                         | IK2876          | 150/154                          | 194/202 | 170/178 | 298/310 | 250/254 | 293/293 | 190/214 | 281/289 | neg                   |     |
| KR5                 | KR02         | 09/28/06                    | KR2             | 146/150                          | ---/--- | 170/182 | ---/306 | 238/258 | ---/--- | 190/190 | ---/--- | neg                   |     |
|                     | KR16         | 10/28/06                    | KR2             | 146/150                          | ---/--- | 170/182 | ---/306 | 238/--- | ---/--- | 190/190 | 281/281 | neg                   |     |
|                     | KR25         | 11/22/06                    | KR2             | 146/150                          | 194/194 | 170/182 | 294/306 | 238/258 | 293/293 | 190/190 | ---/--- | neg                   |     |
|                     | KR40         | 12/07/06                    | KR2             | 146/150                          | 194/194 | 170/182 | 294/306 | 238/258 | 293/293 | 190/190 | 281/281 | neg                   |     |
|                     | KR47         | 12/16/06                    | KR2             | 146/150                          | 194/194 | 170/182 | 294/306 | 238/258 | 293/293 | 190/190 | 281/281 | neg                   |     |
|                     | KR6          | KR13                        | 10/28/06        | KR3                              | 138/146 | ---/--- | 170/182 | 306/314 | 238/238 | 293/293 | 190/194 | ---/---               | neg |
| KR7                 | KR03         | 09/29/06                    | KR3             | 138/146                          | 194/202 | 170/182 | 290/306 | 238/242 | 293/293 | 190/194 | 273/281 | neg                   |     |
|                     | KR12         | 10/28/06                    | KR3             | 138/146                          | 194/202 | 170/182 | 290/306 | 238/242 | 293/293 | 190/194 | 273/281 | neg                   |     |
|                     | KR43         | 12/13/06                    | KR3             | 138/146                          | 194/202 | 170/182 | 290/306 | 238/242 | 293/293 | 190/194 | 273/281 | neg                   |     |
| KR8                 | KR65         | 12/31/06                    | KR3             | 138/146                          | 206/210 | 170/178 | 298/306 | 230/230 | 293/293 | 190/194 | 281/289 | neg                   |     |
|                     | KR9          | KR04                        | 09/29/06        | KR3                              | 138/150 | 202/202 | 178/182 | 290/310 | ---/--- | ---/--- | 194/206 | 273/281               | neg |
|                     |              | KR37                        | 12/07/06        | KR3                              | 138/150 | 202/202 | 178/182 | 290/310 | 238/242 | 293/293 | 194/206 | 273/281               | neg |
|                     |              | KR42                        | 12/13/06        | KR3                              | 138/150 | 202/202 | 178/182 | 290/310 | 238/242 | 293/293 | 194/206 | 273/281               | neg |
|                     |              | KR57                        | 12/19/06        | KR3                              | 138/150 | 202/202 | 178/182 | 290/310 | 238/242 | 293/293 | 194/206 | 273/281               | neg |
| KR10                | KR64         | 12/31/06                    | KR3             | 138/150                          | 202/210 | 170/190 | 290/306 | 238/254 | 293/293 | 190/190 | 281/281 | neg                   |     |
|                     | KR11         | KR07                        | 10/21/06        | KR3                              | 138/154 | 202/202 | 182/194 | ---/--- | 250/254 | 293/293 | 190/210 | 281/281               | neg |
| KR18                |              | 11/07/06                    | KR3             | 138/154                          | ---/--- | 182/194 | ---/--- | 250/254 | ---/--- | ---/--- | ---/--- | neg                   |     |
| KR32                |              | 12/06/06                    | KR3             | 138/154                          | 202/202 | 182/194 | 286/--- | 250/254 | 293/293 | 190/210 | 281/281 | neg                   |     |
| KR46                |              | 12/16/06                    | KR3             | 138/154                          | 202/202 | 182/194 | ---/290 | 250/254 | 293/293 | 190/210 | 281/281 | neg                   |     |
| KR58                |              | 12/19/06                    | KR3             | 138/154                          | 202/202 | 182/194 | ---/--- | 250/--- | 293/293 | 190/210 | 281/281 | neg                   |     |
| KR12                | KR75         | n/a                         | KR3             | 138/154                          | 198/198 | 166/198 | 290/298 | 238/262 | 293/293 | 194/202 | 281/281 | neg                   |     |
| KR13                | KR70         | 01/04/07                    | KR3             | 146/154                          | 206/206 | 166/178 | 294/294 | 238/262 | 293/293 | 194/214 | 281/289 | neg                   |     |

|      |       |          |       |         |         |         |         |         |         |         |         |     |
|------|-------|----------|-------|---------|---------|---------|---------|---------|---------|---------|---------|-----|
| KR14 | KR78  | n/a      | KR3   | 146/154 | ---/--- | 170/182 | ---/--- | 242/250 | 293/293 | 194/194 | 281/285 | neg |
| KR15 | KR11  | 10/21/06 | KR3   | 150/154 | ---/--- | 170/182 | ---/--- | 250/258 | ---/--- | 210/214 | 281/289 | neg |
|      | KR20  | 11/07/06 | KR3   | 150/154 | 202/202 | 170/182 | 290/310 | 250/258 | 293/293 | 210/214 | 281/289 | neg |
| KR16 | KR15  | 10/28/06 | KR5   | 138/138 | 194/242 | 186/186 | 328/328 | ---/--- | ---/--- | 190/190 | ---/--- | neg |
| KR17 | KR63  | 12/31/06 | KR5   | 138/146 | 198/198 | 166/170 | 298/306 | 242/254 | 293/293 | 190/190 | 281/285 | neg |
| KR18 | KR05  | 09/29/06 | KR5   | 138/150 | ---/--- | 170/170 | ---/--- | ---/--- | 293/293 | ---/--- | 281/281 | neg |
|      | KR14  | 10/28/06 | KR5   | 138/150 | ---/--- | 170/170 | 286/310 | 258/262 | ---/--- | 190/194 | 281/281 | neg |
|      | KR30  | 11/26/06 | KR5   | 138/150 | 194/206 | 170/170 | 286/310 | 258/262 | 293/293 | 190/194 | 281/281 | neg |
|      | KR36  | 12/07/06 | KR5   | 138/150 | 194/206 | 170/170 | 286/310 | 258/262 | 293/293 | 190/194 | 281/281 | neg |
| KR19 | KR34  | 12/07/06 | KR5   | 138/150 | 194/202 | 170/182 | 286/310 | 254/258 | 293/293 | 190/194 | 281/281 | neg |
|      | KR35  | 12/07/06 | KR5   | 138/150 | 194/202 | ---/182 | 286/310 | 254/258 | 293/293 | 190/194 | 281/281 | neg |
|      | KR59  | 12/19/06 | KR5   | 138/150 | ---/--- | 170/182 | ---/--- | 254/258 | ---/--- | 190/194 | 281/281 | neg |
| KR20 | KR60  | 12/31/06 | KR5   | 146/154 | 190/202 | 170/170 | 298/298 | 242/242 | 293/293 | 190/194 | 281/285 | neg |
|      | KR61  | 12/31/06 | KR5   | 146/154 | 190/202 | 170/170 | 298/298 | 242/242 | 293/293 | 190/194 | 281/285 | neg |
| KR21 | KR19  | 11/07/06 | KR5   | 150/150 | 202/202 | 182/182 | 310/310 | ---/--- | ---/--- | ---/--- | ---/--- | neg |
| KR22 | KR44  | 12/15/06 | KR5   | 150/150 | 186/202 | 170/182 | 290/310 | 250/258 | 293/293 | 202/214 | 281/281 | neg |
| KR23 | KR45  | 12/15/06 | KR5   | 150/150 | 194/194 | 170/182 | 286/310 | 258/262 | 293/293 | 194/202 | 281/289 | neg |
| KR24 | KR26  | 11/22/06 | KR5   | 150/150 | ---/--- | 170/182 | 290/310 | 258/262 | 293/293 | 202/214 | 281/289 | neg |
|      | KR56  | 12/19/06 | KR5   | 150/150 | 194/202 | 170/182 | 290/310 | 258/262 | 293/293 | 202/214 | 281/289 | neg |
| KR25 | KR62  | 12/31/06 | KR5   | 150/154 | ---/--- | 170/178 | ---/--- | 246/246 | ---/--- | 202/214 | 273/285 | neg |
| KR26 | KR06  | 10/21/06 | KR6   | 138/150 | ---/--- | 170/178 | ---/--- | 242/254 | 293/293 | 202/210 | 289/289 | neg |
| KR27 | KR17  | 11/07/06 | KR6   | 138/150 | 194/194 | 170/178 | ---/--- | ---/--- | 293/293 | ---/214 | ---/--- | neg |
|      | KR24  | 11/22/06 | KR6   | 138/150 | ---/--- | ---/178 | ---/--- | 242/254 | ---/--- | 202/214 | 281/281 | neg |
| KR28 | KR67  | 01/04/07 | KR10  | 138/146 | 198/198 | 178/178 | 298/306 | 246/258 | 293/293 | 202/210 | 273/289 | neg |
| KR29 | KR27  | 11/22/06 | KR10  | 146/150 | 202/202 | 170/182 | 290/302 | 262/262 | 293/293 | 190/194 | 281/285 | neg |
|      | KR54  | 12/19/06 | KR10  | 146/150 | 202/202 | 170/182 | 290/302 | 262/262 | 293/293 | 190/194 | 281/285 | neg |
| KR30 | KR10  | 10/21/06 | KR10  | 146/150 | 174/182 | 170/182 | ---/--- | 262/262 | ---/--- | 190/194 | ---/--- | neg |
|      | KR22  | 11/10/06 | KR10  | 146/150 | ---/--- | 170/182 | 290/302 | 262/262 | ---/--- | 190/194 | 281/285 | neg |
|      | KR39  | 12/07/06 | KR10  | 146/150 | ---/--- | ---/--- | 290/302 | 262/262 | 293/293 | 190/194 | ---/--- | neg |
| KR31 | KR23  | 11/10/06 | KR23  | 154/154 | ---/--- | 166/178 | 286/310 | 242/258 | 293/293 | 190/190 | 281/281 | neg |
|      | KR41  | 12/07/06 | KR23  | 154/154 | ---/--- | 166/178 | ---/310 | 242/258 | 293/293 | 190/190 | 281/281 | neg |
|      | KR52  | 12/19/06 | KR23  | 154/154 | ---/--- | 166/178 | ---/--- | 242/258 | ---/--- | 190/190 | ---/--- | neg |
|      | KR53  | 12/19/06 | KR23  | 154/154 | ---/--- | 166/178 | ---/--- | 242/258 | 293/293 | 190/190 | 281/281 | neg |
| KR32 | KR31  | 11/26/06 | KR23  | 150/154 | 206/206 | 166/166 | ---/--- | ---/--- | 293/293 | 190/238 | ---/--- | neg |
| KR33 | KR74  | n/a      | KR23  | 150/154 | 198/198 | 178/186 | 290/306 | 246/258 | 293/293 | 210/214 | 281/289 | neg |
| KR34 | KR48  | 12/16/06 | KR48  | 138/154 | 198/202 | 178/178 | 294/310 | 242/254 | 293/293 | 190/190 | 285/289 | neg |
| KR35 | KR66  | 12/31/06 | KR66  | 150/150 | ---/--- | 182/182 | ---/--- | ---/--- | ---/--- | ---/--- | ---/--- | neg |
| KR36 | KR73  | 01/04/07 | KR73  | 154/154 | ---/--- | 170/182 | ---/--- | ---/--- | ---/--- | ---/--- | 289/289 | neg |
| KR37 | KR69  | 01/04/07 | LK664 | 138/146 | ---/--- | 170/182 | ---/--- | ---/--- | ---/--- | 194/194 | 281/281 | neg |
| KR38 | KR68  | 01/04/07 | LK664 | 138/150 | ---/--- | 170/182 | ---/--- | 242/268 | 293/293 | 194/202 | 281/289 | neg |
| LK1  | LK645 | 03/24/06 | LK645 | 138/142 | 190/--- | 178/182 | 290/298 | 246/266 | 285/293 | 214/218 | 273/281 | neg |
|      | LK651 | 04/06/06 | LK645 | 138/142 | 190/194 | 178/182 | 290/298 | 246/266 | ---/--- | 214/218 | 273/281 | neg |
| LK2  | LK670 | 05/11/06 | LK645 | 138/138 | ---/--- | 178/186 | 290/310 | 246/246 | ---/--- | 214/214 | 273/273 | neg |
| LK3  | LK674 | 05/19/06 | LK645 | 138/150 | 158/170 | 178/200 | ---/--- | 246/246 | ---/--- | ---/--- | 273/285 | neg |
| LK4  | LK646 | 03/24/06 | LK646 | 138/138 | 202/206 | 166/170 | 310/314 | 246/262 | 293/297 | 210/214 | 273/281 | neg |
|      | LK653 | 04/06/06 | LK646 | 138/138 | 202/206 | 166/170 | 310/314 | 246/262 | 293/297 | 210/214 | 273/--- | neg |
|      | LK657 | 05/05/06 | LK646 | 138/138 | 202/206 | 166/170 | 310/314 | 246/262 | 293/297 | 210/214 | 273/--- | neg |
|      | LK658 | 05/05/06 | LK646 | 138/138 | 202/206 | 166/170 | 310/314 | 246/262 | 293/297 | 210/214 | 273/--- | neg |
|      | LK662 | 05/05/06 | LK646 | 138/138 | 202/206 | 166/170 | 310/314 | 246/262 | 293/297 | 210/214 | 273/--- | neg |
|      | LK666 | 05/11/06 | LK646 | 138/138 | 202/206 | 166/170 | 310/314 | 246/262 | 293/297 | 210/214 | 273/--- | neg |
|      | LK671 | 05/11/06 | LK646 | 138/138 | 202/206 | 166/170 | 310/314 | 246/262 | 293/297 | 210/214 | 273/--- | neg |
|      | LK678 | 05/19/06 | LK646 | 138/138 | ---/--- | 166/170 | ---/--- | 246/262 | 293/297 | 210/214 | 273/--- | neg |
| LK5  | LK685 | 05/19/06 | LK646 | 138/142 | ---/--- | 166/182 | 290/294 | 258/266 | 293/293 | 190/190 | 273/273 | neg |
| LK6  | LK647 | 03/28/06 | LK647 | 142/150 | 202/202 | 166/--- | 298/314 | 242/262 | 293/293 | 210/214 | 285/285 | neg |
|      | LK649 | 04/03/06 | LK647 | 142/150 | 202/202 | 166/174 | 298/314 | 242/262 | 293/293 | 210/214 | 285/285 | neg |
| LK7  | LK667 | 05/11/06 | LK647 | 138/150 | 206/206 | 166/178 | 306/306 | 258/262 | 293/293 | 210/214 | 273/281 | neg |
| LK8  | LK648 | 03/28/06 | LK648 | 138/150 | 202/206 | 182/182 | 290/306 | 242/258 | 293/293 | 210/210 | 273/281 | neg |
|      | LK679 | 05/19/06 | LK648 | 138/150 | 202/206 | 182/182 | 290/306 | 242/258 | 293/293 | 210/210 | 273/281 | neg |
|      | LK681 | 05/19/06 | LK648 | 138/150 | 202/206 | 182/182 | 290/306 | 242/258 | 293/293 | 210/210 | 273/281 | neg |
|      | LK682 | 05/19/06 | LK648 | 138/150 | 202/206 | 182/182 | 290/306 | 242/258 | 293/293 | 210/210 | 273/281 | neg |
| LK9  | LK654 | 04/16/06 | LK648 | 138/150 | 198/202 | 170/182 | 310/318 | 254/258 | 293/293 | 190/210 | 281/285 | neg |
|      | LK677 | 05/19/06 | LK648 | 138/150 | 198/202 | 170/182 | 310/318 | 254/258 | 293/293 | 190/210 | 281/285 | neg |
|      | LK686 | 05/24/06 | LK648 | 138/150 | ---/--- | 170/182 | ---/--- | 254/258 | 293/293 | 190/210 | 281/285 | neg |
|      | LK687 | 05/24/06 | LK648 | 138/150 | ---/--- | 170/182 | ---/--- | 254/258 | 293/293 | 190/210 | 281/285 | neg |
| LK10 | LK676 | 05/19/06 | LK648 | 138/150 | 202/202 | 170/182 | 310/318 | 254/258 | 293/293 | 190/210 | 281/281 | neg |
| LK11 | LK680 | 05/19/06 | LK648 | 142/146 | 202/202 | 182/182 | 306/310 | 242/258 | 293/293 | 210/210 | 273/273 | neg |
| LK12 | LK650 | 04/06/06 | LK650 | 138/138 | 202/206 | 166/182 | 290/306 | 258/258 | 293/293 | 190/190 | 273/281 | neg |
| LK13 | LK661 | 05/05/06 | LK650 | 138/146 | 202/202 | 166/182 | 306/306 | 246/254 | 293/293 | 206/210 | 273/281 | neg |
|      | LK683 | 05/19/06 | LK650 | 138/146 | 202/202 | 166/182 | 306/306 | 246/254 | ---/--- | 206/210 | 273/281 | neg |
|      | LK684 | 05/19/06 | LK650 | 138/146 | 202/202 | 166/182 | 306/306 | 246/254 | 293/293 | 206/210 | 273/281 | neg |
| LK14 | LK652 | 04/06/06 | LK652 | 138/138 | ---/202 | 166/170 | ---/--- | 246/266 | 293/293 | 190/210 | ---/--- | neg |
|      | LK659 | 05/05/06 | LK652 | 138/138 | ---/202 | 166/170 | 286/292 | 246/266 | 293/293 | 190/210 | 273/273 | neg |
|      | LK663 | 05/11/06 | LK652 | 138/138 | ---/202 | 166/170 | 286/292 | 246/266 | 293/293 | 190/210 | 273/273 | neg |
|      | LK665 | 05/11/06 | LK652 | 138/138 | 198/202 | 166/170 | 286/292 | 246/266 | 293/293 | 190/210 | 273/273 | neg |



|      |       |          |       |         |         |         |         |         |         |         |         |     |
|------|-------|----------|-------|---------|---------|---------|---------|---------|---------|---------|---------|-----|
| LK15 | LK664 | 05/11/06 | LK664 | 138/150 | ---/--- | 170/190 | ---/--- | 262/262 | ---/--- | 210/214 | ---/--- | neg |
| LK16 | LK668 | 05/11/06 | LK664 | 138/146 | 206/206 | 174/178 | ---/306 | 258/258 | 293/293 | 206/210 | 273/281 | neg |
|      | LK672 | 05/11/06 | LK664 | 138/146 | 206/206 | 174/178 | 264/306 | 258/258 | 293/293 | 206/210 | 273/281 | neg |
| LK17 | LK673 | 05/19/06 | LK673 | 138/138 | 206/206 | 170/170 | 306/318 | 238/266 | 293/293 | 210/210 | 273/281 | neg |

<sup>1</sup>Individual bonobos are numbered according to their field site of origin (as shown in Figure 1).

<sup>2</sup>Microsatellite loci are indicated; alleles that failed to amplify are indicated by dashed lines.

<sup>3</sup>WB, Western blot; neg, negative.
